# Supplementary material for: Theoretical studies on the mechanism of molybdenum-catalysed deoxydehydration of diols
Source: Royal Society of Chemistry journal article supplement (doi:10.1039/d3dt00340j), 2023-01-01
Supplement: d3dt00340j1.pdf [file d3dt00340j1.pdf]

## SUPPORTING INFORMATION

### Theoretical Studies on the Mechanism of Molybdenum-Catalysed Deoxydehydration of Diols

Federico Verdicchio,<sup>†</sup> Agustín Galindo\*

*Departamento de Química Inorgánica, Facultad de Química, Universidad de Sevilla, Aptdo. 1203, 41071 Sevilla, Spain.*

---

**Fig. S1.** Catalytic profiles, pathways **A** and **B**, for the DODH of ethylene glycol with  $\text{PMe}_3$  catalyzed by  $[\text{Mo}(\text{O})_2(\text{Q}^{\text{Me}})_2]$  in gas phase (relative  $\Delta G$  in  $\text{kcal}\cdot\text{mol}^{-1}$ ).

**Table S1.** Coordinates of optimized compounds.

**Table S2.** Comparison of selected energies for pathways **A** and **B**, in gas phase, in the  $[\text{Mo}(\text{O})_2(\text{Q}^{\text{Me}})_2]$ -catalyzed DODH of ethylene glycol with  $\text{PMe}_3$  reductant.

---

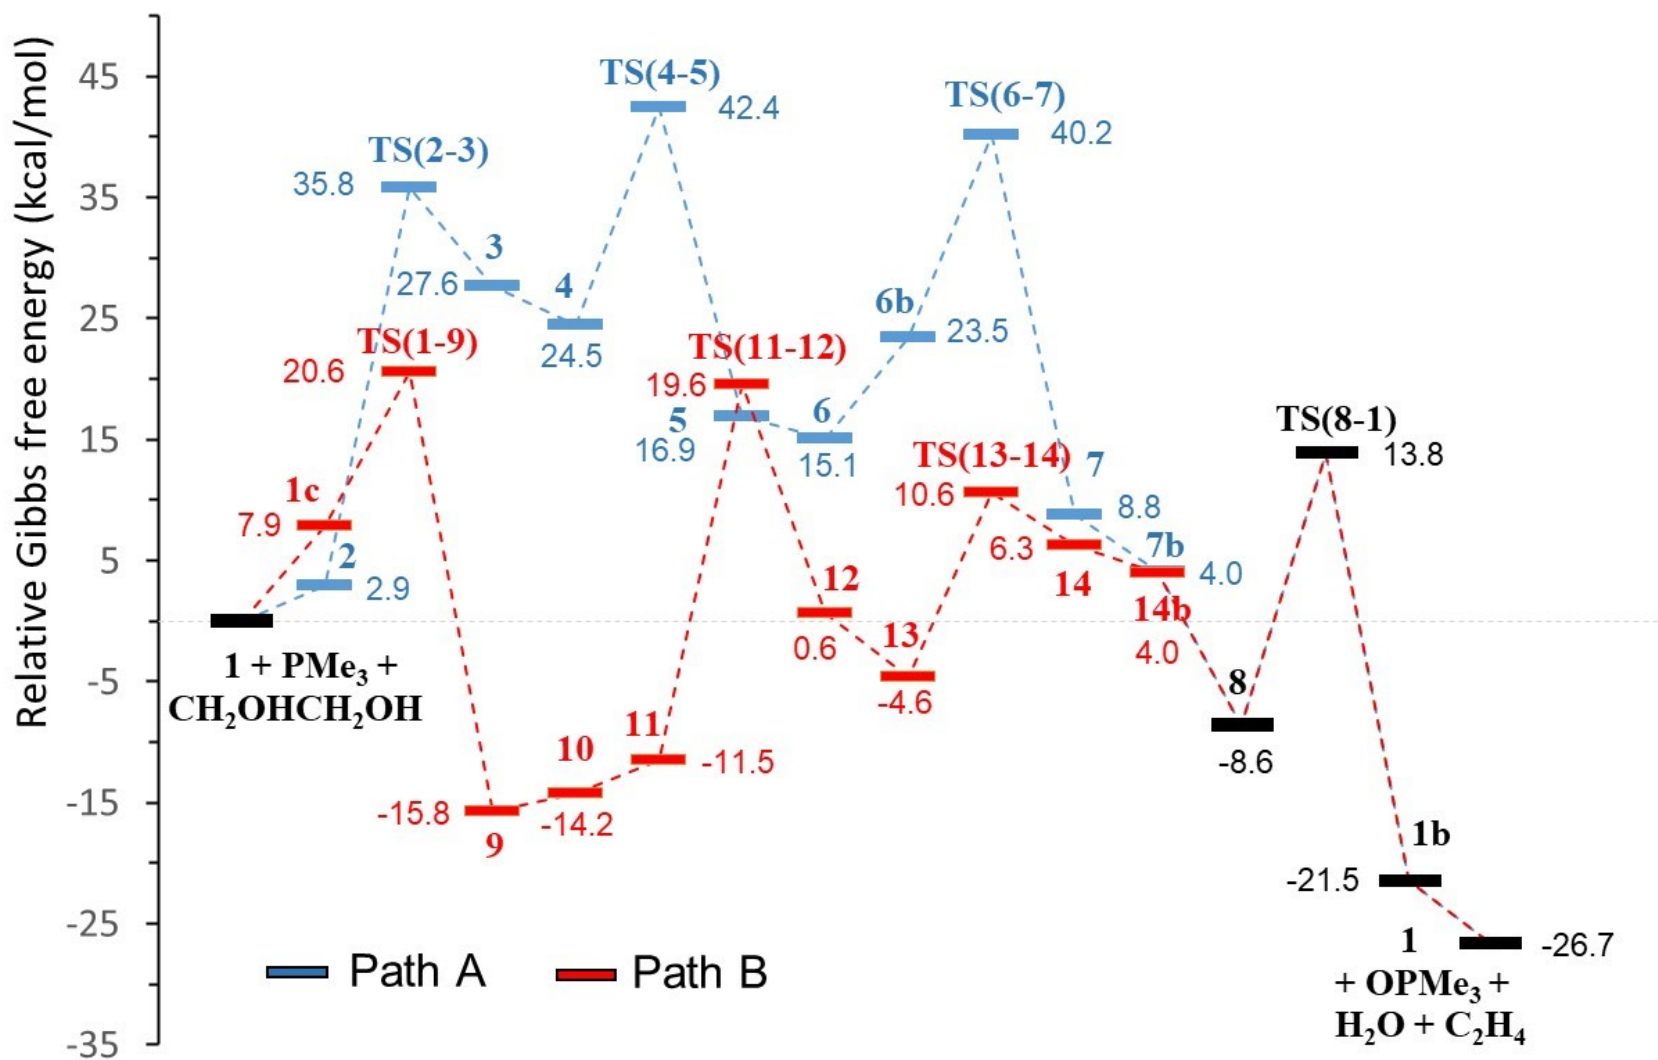

**Fig. S1.** Catalytic profiles, pathways **A** (blue) and **B** (red), for the DODH of ethylene glycol with PMe<sub>3</sub> catalyzed by [Mo(O)<sub>2</sub>(Q<sup>Me</sup>)<sub>2</sub>] in gas phase (relative  $\Delta G$  in kcal·mol<sup>-1</sup>, common steps in black).

**Table S1.** Coordinates of optimized compounds.**1**

|    |             |             |             |
|----|-------------|-------------|-------------|
| C  | -3.63857500 | 1.80426200  | 1.92780900  |
| C  | -1.03415800 | 1.47534700  | 1.88537800  |
| C  | -2.38601400 | 1.21567000  | 1.53945500  |
| C  | -2.74498000 | 0.21733300  | 0.59866400  |
| C  | 1.03415400  | 1.47551300  | -1.88527700 |
| C  | 2.38600800  | 1.21582900  | -1.53934300 |
| C  | 2.74497600  | 0.21742600  | -0.59862100 |
| C  | 3.63856200  | 1.80450600  | -1.92759300 |
| N  | -4.63916600 | 1.23673800  | 1.30073200  |
| N  | -4.09961700 | 0.26405500  | 0.47481000  |
| N  | 4.09961000  | 0.26416300  | -0.47474300 |
| N  | 4.63915700  | 1.23691600  | -1.30058300 |
| O  | -0.09663900 | 0.80918800  | 1.38044300  |
| O  | 0.09663600  | 0.80925100  | -1.38047500 |
| O  | -2.00770100 | -0.61318300 | -0.05797700 |
| O  | 2.00771000  | -0.61316000 | 0.05794800  |
| O  | 0.06731900  | -2.02907300 | 1.35482000  |
| O  | -0.06728300 | -2.02902400 | -1.35491500 |
| Mo | 0.00000800  | -0.98533900 | -0.00002800 |
| C  | -0.65931400 | 2.55773100  | 2.86631000  |
| H  | -1.03631900 | 3.52979800  | 2.53968000  |
| H  | -1.09348100 | 2.34941500  | 3.84762800  |
| H  | 0.42499400  | 2.59546000  | 2.95329900  |
| C  | -3.92118200 | 2.90985500  | 2.89542100  |
| H  | -3.55744200 | 2.67013600  | 3.89826100  |
| H  | -3.44935700 | 3.84722500  | 2.58766500  |
| H  | -4.99855600 | 3.06664800  | 2.94529100  |
| C  | 0.65931900  | 2.55796000  | -2.86614000 |
| H  | 1.03632700  | 3.53000400  | -2.53945000 |
| H  | 1.09348800  | 2.34970000  | -3.84747000 |
| H  | -0.42498900 | 2.59569600  | -2.95313400 |
| C  | 3.92115500  | 2.91021800  | -2.89507300 |
| H  | 3.55740200  | 2.67061800  | -3.89793700 |
| H  | 3.44933200  | 3.84755000  | -2.58719800 |
| H  | 4.99852800  | 3.06702100  | -2.94493800 |
| C  | -4.97565700 | -0.53364300 | -0.31959200 |
| C  | -6.34529900 | -0.49647300 | -0.03873800 |
| C  | -4.49290000 | -1.32788200 | -1.36494700 |
| C  | -7.22491200 | -1.25472300 | -0.80237300 |
| H  | -6.69933500 | 0.12994800  | 0.76676900  |
| C  | -5.38972400 | -2.08353200 | -2.11540700 |
| H  | -3.43726800 | -1.35958800 | -1.58508400 |
| C  | -6.75436800 | -2.05343500 | -1.84255000 |
| H  | -8.28498200 | -1.22055600 | -0.57799300 |
| H  | -5.00872800 | -2.69895100 | -2.92225000 |
| H  | -7.44369700 | -2.64537300 | -2.43334600 |
| C  | 4.97565300  | -0.53364300 | 0.31954700  |
| C  | 6.34527300  | -0.49657300 | 0.03857600  |
| C  | 4.49291600  | -1.32788500 | 1.36490800  |
| C  | 7.22488800  | -1.25493500 | 0.80209800  |
| H  | 6.69928800  | 0.12986200  | -0.76693000 |
| C  | 5.38974000  | -2.08365400 | 2.11525000  |
| H  | 3.43730100  | -1.35950800 | 1.58513700  |
| C  | 6.75436200  | -2.05366200 | 1.84227200  |
| H  | 8.28494200  | -1.22084800 | 0.57763100  |
| H  | 5.00876600  | -2.69908000 | 2.92209700  |
| H  | 7.44369000  | -2.64569300 | 2.43297600  |

**1b**

|   |             |             |             |
|---|-------------|-------------|-------------|
| C | 3.61375800  | -2.11472600 | 1.93643200  |
| C | 1.01173200  | -1.77043300 | 1.89238900  |
| C | 2.36491900  | -1.51952900 | 1.54628700  |
| C | 2.73037000  | -0.52668700 | 0.60226800  |
| C | -1.04956600 | -1.77610800 | -1.87866400 |
| C | -2.40020400 | -1.50924100 | -1.53457000 |
| C | -2.75577500 | -0.50440400 | -0.59954200 |

|    |             |             |             |
|----|-------------|-------------|-------------|
| C  | -3.65495800 | -2.09496300 | -1.92012500 |
| N  | 4.61750400  | -1.55545700 | 1.30709000  |
| N  | 4.08430800  | -0.58179300 | 0.47832200  |
| N  | -4.11025100 | -0.54443000 | -0.47597800 |
| N  | -4.65322800 | -1.51976500 | -1.29641100 |
| O  | 0.07780600  | -1.10115000 | 1.38402600  |
| O  | -0.10924700 | -1.11130800 | -1.37624800 |
| O  | 1.99685300  | 0.30568300  | -0.05715800 |
| O  | -2.01426700 | 0.32626200  | 0.05301600  |
| O  | 0.06698100  | 1.72664800  | -1.36269700 |
| Mo | -0.00672400 | 0.68708400  | -0.00349800 |
| C  | 0.20377400  | 5.31830000  | -0.66205400 |
| C  | 0.20663200  | 5.31986800  | 0.66613500  |
| O  | -0.07025100 | 1.73746900  | 1.34787100  |
| H  | 0.12476000  | 4.39496900  | -1.22615100 |
| H  | 0.12873200  | 4.39790100  | 1.23260000  |
| H  | 0.28681000  | 6.24131100  | 1.23501200  |
| H  | 0.28111500  | 6.23845200  | -1.23342300 |
| C  | 3.88976500  | -3.21860100 | 2.90782700  |
| H  | 3.53117300  | -2.97140100 | 3.91072800  |
| H  | 3.40900900  | -4.15317200 | 2.60555100  |
| H  | 4.96589900  | -3.38427300 | 2.95533000  |
| C  | 0.63033200  | -2.84761500 | 2.87623100  |
| H  | 0.99085800  | -3.82437600 | 2.54465100  |
| H  | 1.07618800  | -2.64716300 | 3.85380100  |
| H  | -0.45358200 | -2.87103800 | 2.97242300  |
| C  | -0.67863500 | -2.86491300 | -2.85365800 |
| H  | -1.05292600 | -3.83475400 | -2.51718400 |
| H  | -1.11841900 | -2.66497600 | -3.83413700 |
| H  | 0.40520600  | -2.90271000 | -2.94604500 |
| C  | -3.94173400 | -3.20471900 | -2.88164700 |
| H  | -3.57997300 | -2.97036300 | -3.88648700 |
| H  | -3.47076200 | -4.14136500 | -2.57051400 |
| H  | -5.01948100 | -3.35978100 | -2.92838100 |
| C  | -4.98393400 | 0.26071100  | 0.31408100  |
| C  | -6.35451900 | 0.21963800  | 0.03854300  |
| C  | -4.49788500 | 1.06588200  | 1.34946600  |
| C  | -7.23186000 | 0.98488600  | 0.79773800  |
| H  | -6.71108700 | -0.41471600 | -0.75955400 |
| C  | -5.39255600 | 1.82836000  | 2.09556800  |
| H  | -3.44149600 | 1.10142600  | 1.56512900  |
| C  | -6.75813400 | 1.79431600  | 1.82811000  |
| H  | -8.29267700 | 0.94782900  | 0.57745400  |
| H  | -5.00897200 | 2.45276100  | 2.89418300  |
| H  | -7.44570400 | 2.39188800  | 2.41523500  |
| C  | 4.96610500  | 0.20607000  | -0.32025100 |
| C  | 6.33737100  | 0.14505400  | -0.05166300 |
| C  | 4.48721800  | 1.01388700  | -1.35693600 |
| C  | 7.22248400  | 0.89295400  | -0.81906400 |
| H  | 6.68825300  | -0.49080900 | 0.74772000  |
| C  | 5.38974100  | 1.75873200  | -2.11134400 |
| H  | 3.43045300  | 1.06491500  | -1.56739000 |
| C  | 6.75600500  | 1.70472400  | -1.85088500 |
| H  | 8.28373000  | 0.84044900  | -0.60404600 |
| H  | 5.01164800  | 2.38534500  | -2.91083800 |
| H  | 7.44966300  | 2.28875300  | -2.44444600 |

### 1c

|   |             |             |            |
|---|-------------|-------------|------------|
| C | 3.52300600  | 0.42354800  | 2.25054300 |
| C | 0.92136900  | 0.58386400  | 1.93545700 |
| C | 2.25725700  | 0.23977600  | 1.59579000 |
| C | 2.57825900  | -0.45417500 | 0.40366400 |
| C | -1.46825100 | -2.85129500 | 0.90902000 |
| C | -2.76341700 | -2.28918000 | 0.76873200 |
| C | -2.99191500 | -1.09673600 | 0.03632800 |
| C | -4.06357200 | -2.66197100 | 1.25532700 |
| N | 4.49705500  | -0.10018900 | 1.54688400 |
| N | 3.92478600  | -0.65236300 | 0.41281600 |
| N | -4.32468200 | -0.83311800 | 0.12238700 |
| N | -4.97429600 | -1.80346200 | 0.86825100 |

|    |             |             |             |
|----|-------------|-------------|-------------|
| O  | -0.03152300 | 0.30213200  | 1.16527400  |
| O  | -0.46608500 | -2.31026500 | 0.37860500  |
| O  | 1.81624000  | -0.85585200 | -0.56030900 |
| O  | -2.16737600 | -0.34818700 | -0.61406200 |
| O  | -0.04650900 | 1.09759600  | -1.54864000 |
| O  | -0.15468000 | -1.50613300 | -2.32855600 |
| Mo | -0.15424600 | -0.50420900 | -0.94065000 |
| P  | 1.33629600  | 4.36170200  | 0.43866200  |
| C  | -0.32794100 | 4.60132600  | -0.35511000 |
| H  | -0.28699800 | 5.29949900  | -1.19715700 |
| H  | -0.68406200 | 3.63389200  | -0.71540200 |
| H  | -1.04062800 | 4.97822500  | 0.38244400  |
| C  | 2.32538100  | 3.89517400  | -1.06495900 |
| H  | 2.23557100  | 4.63680000  | -1.86502700 |
| H  | 3.37962900  | 3.78926000  | -0.79852000 |
| H  | 1.96755800  | 2.93308200  | -1.43776300 |
| C  | 1.86275700  | 6.13817000  | 0.63392100  |
| H  | 1.76618100  | 6.70690500  | -0.29653000 |
| H  | 1.25374400  | 6.61849600  | 1.40377800  |
| H  | 2.90432000  | 6.17745200  | 0.96230100  |
| C  | -1.23080500 | -4.11558400 | 1.69579700  |
| H  | -1.55965400 | -3.99689900 | 2.73112900  |
| H  | -1.79425100 | -4.94703700 | 1.26487300  |
| H  | -0.16817800 | -4.35015500 | 1.67484500  |
| C  | -4.47669700 | -3.82979700 | 2.09415700  |
| H  | -4.24182100 | -4.77956600 | 1.60600900  |
| H  | -3.97760200 | -3.82546100 | 3.06712900  |
| H  | -5.55306800 | -3.78150800 | 2.25810700  |
| C  | 0.58483800  | 1.30678100  | 3.21070500  |
| H  | 1.08508100  | 0.86610700  | 4.07414900  |
| H  | 0.91210600  | 2.34724800  | 3.11706300  |
| H  | -0.49445600 | 1.28886300  | 3.35318700  |
| C  | 3.84483300  | 1.10523600  | 3.54237600  |
| H  | 3.49077600  | 2.13929500  | 3.54530600  |
| H  | 3.38757600  | 0.59400400  | 4.39441800  |
| H  | 4.92588000  | 1.10328200  | 3.68148700  |
| C  | -5.08910300 | 0.22461000  | -0.45286300 |
| C  | -6.48237000 | 0.10328700  | -0.47173900 |
| C  | -4.47526200 | 1.36596000  | -0.97927200 |
| C  | -7.25431300 | 1.12153200  | -1.01866900 |
| H  | -6.93791400 | -0.78188700 | -0.05281900 |
| C  | -5.26575500 | 2.37282000  | -1.52679900 |
| H  | -3.40100500 | 1.46341900  | -0.96626200 |
| C  | -6.65294400 | 2.26005500  | -1.55097000 |
| H  | -8.33351600 | 1.01931800  | -1.02975500 |
| H  | -4.78349400 | 3.25338900  | -1.93535500 |
| H  | -7.25882400 | 3.05001100  | -1.97929600 |
| C  | 4.76713800  | -1.27269400 | -0.55640500 |
| C  | 6.14887700  | -1.07903300 | -0.45675300 |
| C  | 4.24033600  | -2.06634600 | -1.58087500 |
| C  | 6.99604000  | -1.67627900 | -1.38271800 |
| H  | 6.53647300  | -0.47026800 | 0.34681200  |
| C  | 5.10529900  | -2.65203400 | -2.50138000 |
| H  | 3.17546300  | -2.21916300 | -1.66125000 |
| C  | 6.48145900  | -2.46328600 | -2.41092000 |
| H  | 8.06561000  | -1.52074300 | -1.29838500 |
| H  | 4.69015700  | -3.26314600 | -3.29456900 |
| H  | 7.14561800  | -2.92424400 | -3.13275100 |

2

|   |             |             |             |
|---|-------------|-------------|-------------|
| C | 3.53973400  | 0.31564500  | 2.43480500  |
| C | 0.92936900  | 0.40861200  | 2.13560200  |
| C | 2.28147200  | 0.19367200  | 1.75149700  |
| C | 2.63060200  | -0.29051500 | 0.46598000  |
| C | -1.34987900 | -2.91858500 | 0.38251100  |
| C | -2.65969600 | -2.38143600 | 0.35265400  |
| C | -2.92092100 | -1.06712200 | -0.11177900 |
| C | -3.95050100 | -2.88654200 | 0.73501900  |
| N | 4.53171600  | -0.05656300 | 1.66300200  |
| N | 3.98346600  | -0.43592300 | 0.45010200  |

|    |             |             |             |
|----|-------------|-------------|-------------|
| N  | -4.25956200 | -0.86495700 | 0.01559000  |
| N  | -4.88367900 | -1.99056400 | 0.53039500  |
| O  | -0.00890900 | 0.14993000  | 1.33835100  |
| O  | -0.36337300 | -2.24192200 | -0.01025200 |
| O  | 1.88364000  | -0.56360700 | -0.55506300 |
| O  | -2.11276600 | -0.17865100 | -0.58129000 |
| O  | -0.03221700 | -0.84732200 | -2.46704600 |
| Mo | -0.09018300 | -0.20843900 | -0.88208300 |
| O  | -0.02897300 | 1.50625500  | -1.08069900 |
| O  | 0.45044600  | 3.38466200  | 1.09453500  |
| C  | 1.39849100  | 4.28844000  | 0.54239000  |
| H  | 1.80355000  | 4.86292600  | 1.38283700  |
| H  | 2.23614600  | 3.76419700  | 0.06473800  |
| C  | 0.76316000  | 5.24439200  | -0.46822900 |
| H  | 0.38478200  | 4.67653400  | -1.32151500 |
| H  | 0.15374500  | 2.79655800  | 0.38271600  |
| H  | -0.08949300 | 5.75264000  | 0.00218900  |
| O  | 1.70962300  | 6.16804400  | -0.99769500 |
| H  | 1.98226200  | 6.75245400  | -0.28369900 |
| C  | 0.54371400  | 0.97856500  | 3.46954800  |
| H  | 1.22974500  | 0.70909700  | 4.26998800  |
| H  | 0.53870800  | 2.06764900  | 3.35059000  |
| H  | -0.46951800 | 0.65979200  | 3.71245900  |
| C  | 3.84517500  | 0.78997500  | 3.82066400  |
| H  | 3.45235800  | 1.79437400  | 3.99660100  |
| H  | 3.41779100  | 0.12611600  | 4.57785300  |
| H  | 4.92682900  | 0.80870100  | 3.95355200  |
| C  | -4.33020200 | -4.21771600 | 1.30182800  |
| H  | -4.06258200 | -5.03449200 | 0.62584900  |
| H  | -3.83556300 | -4.40497600 | 2.25901700  |
| H  | -5.40821600 | -4.23823600 | 1.46050300  |
| C  | -1.06849200 | -4.31223700 | 0.88113500  |
| H  | -1.39257000 | -4.42420400 | 1.91880300  |
| H  | -1.61188200 | -5.04970500 | 0.28527500  |
| H  | 0.00020800  | -4.50525300 | 0.80978100  |
| C  | 4.85025600  | -0.90391200 | -0.58278500 |
| C  | 6.19402700  | -1.13050200 | -0.26555700 |
| C  | 4.38816700  | -1.13163000 | -1.88359600 |
| C  | 7.06664800  | -1.58360400 | -1.24759300 |
| H  | 6.53405300  | -0.94320300 | 0.74211100  |
| C  | 5.27805400  | -1.58802200 | -2.85243500 |
| H  | 3.35402500  | -0.95900600 | -2.13577000 |
| C  | 6.61612600  | -1.81663000 | -2.54522700 |
| H  | 8.10617400  | -1.75530800 | -0.99231800 |
| H  | 4.91222800  | -1.76106600 | -3.85795800 |
| H  | 7.30029700  | -2.17020100 | -3.30774900 |
| C  | -5.05127900 | 0.27101200  | -0.32770000 |
| C  | -6.43714600 | 0.11094800  | -0.42272800 |
| C  | -4.46905200 | 1.52226100  | -0.55327800 |
| C  | -7.23420000 | 1.20278500  | -0.74609700 |
| H  | -6.86806300 | -0.86156400 | -0.23487400 |
| C  | -5.28377800 | 2.60244100  | -0.88124900 |
| H  | -3.40047000 | 1.64999200  | -0.47748900 |
| C  | -6.66420100 | 2.45247100  | -0.97987100 |
| H  | -8.30785500 | 1.07138800  | -0.81787100 |
| H  | -4.82676600 | 3.56945800  | -1.05666800 |
| H  | -7.28949800 | 3.30012500  | -1.23486100 |

### TS(2-3)

|   |             |             |             |
|---|-------------|-------------|-------------|
| C | 3.53111300  | -0.99602300 | 2.62521300  |
| C | 1.03655500  | -0.21358100 | 2.68749800  |
| C | 2.27586200  | -0.52601900 | 2.09810900  |
| C | 2.49921300  | -0.40100000 | 0.69483700  |
| C | -1.22130100 | -2.37531100 | -0.42510900 |
| C | -2.58106200 | -2.05518900 | -0.54802800 |
| C | -3.02760700 | -0.73444100 | -0.27693000 |
| C | -3.78297400 | -2.79989800 | -0.81102000 |
| N | 4.41478400  | -1.14567100 | 1.67402500  |
| N | 3.79372000  | -0.78864400 | 0.48285000  |
| N | -4.38709500 | -0.75677300 | -0.38256600 |

|    |             |             |             |
|----|-------------|-------------|-------------|
| N  | -4.83518200 | -2.02842900 | -0.71738400 |
| O  | 0.07850300  | 0.22630200  | 1.99003900  |
| O  | -0.35197900 | -1.48486100 | -0.18169800 |
| O  | 1.72376900  | -0.02943100 | -0.24738000 |
| O  | -2.34998200 | 0.29822500  | 0.04562200  |
| O  | -0.23081300 | 0.80806300  | -1.81624200 |
| Mo | -0.27661700 | 0.72054400  | -0.11230600 |
| O  | -1.04490900 | 2.29833900  | 0.42850200  |
| O  | 1.14823100  | 2.42401100  | 0.13068800  |
| C  | 2.02340300  | 2.91064000  | -0.87218400 |
| H  | 2.63956600  | 2.07984300  | -1.23212300 |
| H  | 1.46068200  | 3.30818000  | -1.72606200 |
| C  | 2.92486100  | 3.99907900  | -0.28493000 |
| H  | 2.31855700  | 4.84070200  | 0.05599200  |
| H  | 0.00475400  | 2.82599300  | 0.34724800  |
| H  | 3.45967500  | 3.59559000  | 0.58474000  |
| O  | 3.81321800  | 4.51996400  | -1.26553500 |
| H  | 4.42743900  | 3.82066400  | -1.51064100 |
| C  | 0.77739900  | -0.37421300 | 4.16368100  |
| H  | 1.00539100  | -1.38920800 | 4.49602100  |
| H  | 1.40856200  | 0.31065600  | 4.73649900  |
| H  | -0.26783500 | -0.14698400 | 4.36494800  |
| C  | 3.91754100  | -1.31106400 | 4.03578300  |
| H  | 3.79976200  | -0.44193300 | 4.68868200  |
| H  | 3.30900000  | -2.11990800 | 4.45009300  |
| H  | 4.96223800  | -1.62106600 | 4.05427000  |
| C  | -3.95451900 | -4.24189900 | -1.16777400 |
| H  | -3.42087400 | -4.49279800 | -2.08902700 |
| H  | -3.57899300 | -4.89944500 | -0.37867300 |
| H  | -5.01470500 | -4.44748600 | -1.31431700 |
| C  | -0.70773600 | -3.78694900 | -0.55198300 |
| H  | -1.17324500 | -4.43635500 | 0.19356000  |
| H  | -0.95015300 | -4.18968300 | -1.53860600 |
| H  | 0.37204500  | -3.79042000 | -0.41667200 |
| C  | 4.54381300  | -0.82933300 | -0.72534900 |
| C  | 5.93727100  | -0.93249100 | -0.64394000 |
| C  | 3.91704100  | -0.77741100 | -1.97623200 |
| C  | 6.69484700  | -0.97545200 | -1.80856600 |
| H  | 6.40287400  | -0.98585800 | 0.32936200  |
| C  | 4.69465700  | -0.81531200 | -3.13133000 |
| H  | 2.84236600  | -0.70688300 | -2.04256900 |
| C  | 6.08128800  | -0.91334400 | -3.05837600 |
| H  | 7.77354300  | -1.05566300 | -1.73488000 |
| H  | 4.20185200  | -0.77241400 | -4.09599100 |
| H  | 6.67675400  | -0.94413600 | -3.96337800 |
| C  | -5.33683400 | 0.29321000  | -0.20854300 |
| C  | -6.68920000 | 0.01040000  | -0.42956400 |
| C  | -4.93862200 | 1.58003500  | 0.17319800  |
| C  | -7.63731000 | 1.01400700  | -0.26909700 |
| H  | -6.97638500 | -0.98842600 | -0.72290300 |
| C  | -5.90575900 | 2.56994600  | 0.32719700  |
| H  | -3.89671900 | 1.80452600  | 0.34359900  |
| C  | -7.25362400 | 2.29867700  | 0.10951900  |
| H  | -8.68285500 | 0.78600400  | -0.44322700 |
| H  | -5.59078600 | 3.56458700  | 0.62139700  |
| H  | -7.99637700 | 3.07839200  | 0.23260300  |

### 3

|   |             |             |             |
|---|-------------|-------------|-------------|
| C | 3.57789600  | -1.06514100 | 2.60319900  |
| C | 1.15487500  | -0.10812900 | 2.80612200  |
| C | 2.34406600  | -0.47337500 | 2.15173200  |
| C | 2.52999700  | -0.27726100 | 0.74930900  |
| C | -0.86917600 | -2.27839400 | -0.34804700 |
| C | -2.22185300 | -2.04649500 | -0.64413600 |
| C | -2.82480800 | -0.83023200 | -0.23173700 |
| C | -3.30927400 | -2.84353300 | -1.14209200 |
| N | 4.41573800  | -1.22052400 | 1.61268800  |
| N | 3.78445900  | -0.74611400 | 0.46816900  |
| N | -4.16003200 | -0.95570000 | -0.48465500 |
| N | -4.44052800 | -2.19163100 | -1.05277100 |

|    |             |             |             |
|----|-------------|-------------|-------------|
| O  | 0.19289700  | 0.41566900  | 2.17181700  |
| O  | -0.11908900 | -1.35690800 | 0.08922600  |
| O  | 1.76320000  | 0.22693100  | -0.13318900 |
| O  | -2.29221000 | 0.18356800  | 0.33273700  |
| O  | -0.41503500 | 0.79277600  | -1.59677700 |
| Mo | -0.28821600 | 0.88750300  | 0.10128200  |
| O  | -1.43643500 | 2.28654200  | 0.79953600  |
| O  | 0.77755900  | 2.56530400  | 0.05749800  |
| C  | 1.73574200  | 2.89605400  | -0.92495800 |
| H  | 2.66511600  | 2.33568100  | -0.76821200 |
| H  | 1.35963600  | 2.62978100  | -1.92291300 |
| C  | 2.01197000  | 4.39849700  | -0.84966600 |
| H  | 1.10138100  | 4.95523700  | -1.07718200 |
| H  | -0.90160300 | 3.09278600  | 0.84308400  |
| H  | 2.32409400  | 4.66095100  | 0.16991100  |
| O  | 2.97477700  | 4.79161200  | -1.81960500 |
| H  | 3.81318500  | 4.37795900  | -1.59119600 |
| C  | 0.94918400  | -0.30909700 | 4.28607000  |
| H  | 0.99819400  | -1.37132700 | 4.53952700  |
| H  | 1.72426100  | 0.20302700  | 4.86068200  |
| H  | -0.02771600 | 0.08296500  | 4.56252100  |
| C  | 3.98534100  | -1.49867300 | 3.97606300  |
| H  | 3.99356400  | -0.65991900 | 4.67793800  |
| H  | 3.30882900  | -2.25801900 | 4.37784800  |
| H  | 4.98960400  | -1.91957100 | 3.92859300  |
| C  | -3.29215000 | -4.21499900 | -1.73789500 |
| H  | -2.61649800 | -4.26824200 | -2.59631900 |
| H  | -2.96542600 | -4.96627600 | -1.01312900 |
| H  | -4.29804200 | -4.47121100 | -2.07011300 |
| C  | -0.23387000 | -3.63844900 | -0.49469300 |
| H  | -0.80522700 | -4.40045700 | 0.03939900  |
| H  | -0.20812300 | -3.92185600 | -1.55080800 |
| H  | 0.78467000  | -3.60406100 | -0.11278100 |
| C  | 4.48753000  | -0.77122400 | -0.76837900 |
| C  | 5.87511100  | -0.95094500 | -0.74572100 |
| C  | 3.81786600  | -0.63364400 | -1.98977500 |
| C  | 6.58508900  | -0.98608200 | -1.94026800 |
| H  | 6.37278100  | -1.06944800 | 0.20580200  |
| C  | 4.54785400  | -0.66521800 | -3.17534500 |
| H  | 2.74718800  | -0.50104100 | -2.00897200 |
| C  | 5.92896100  | -0.84016500 | -3.16101100 |
| H  | 7.65984000  | -1.12616800 | -1.91304100 |
| H  | 4.02291500  | -0.55508300 | -4.11744300 |
| H  | 6.48740400  | -0.86478500 | -4.08951000 |
| C  | -5.22600300 | -0.03869400 | -0.24803200 |
| C  | -6.53156700 | -0.44515300 | -0.54473300 |
| C  | -4.98450400 | 1.24297500  | 0.26176500  |
| C  | -7.59010000 | 0.43035000  | -0.33256000 |
| H  | -6.69604900 | -1.43671600 | -0.93968900 |
| C  | -6.06065500 | 2.10267500  | 0.46644900  |
| H  | -3.97952900 | 1.56141200  | 0.49524000  |
| C  | -7.36325400 | 1.70833000  | 0.17364200  |
| H  | -8.59830600 | 0.10722500  | -0.56634900 |
| H  | -5.86773800 | 3.09409400  | 0.86039300  |
| H  | -8.19172100 | 2.38788800  | 0.33711600  |

#### 4

|   |             |             |             |
|---|-------------|-------------|-------------|
| C | -2.69619400 | -2.47561200 | -2.15732300 |
| C | -0.28338400 | -1.76059200 | -1.43823300 |
| C | -1.68403100 | -1.71461500 | -1.46785000 |
| C | -2.41012800 | -0.87317800 | -0.57515100 |
| C | 0.81121400  | -0.97157600 | 2.47884700  |
| C | 2.10177400  | -1.16339800 | 1.93461200  |
| C | 2.58516200  | -0.32741000 | 0.89570300  |
| C | 3.19866300  | -2.04105300 | 2.23587800  |
| N | -3.89160600 | -2.14975800 | -1.73940200 |
| N | -3.72585300 | -1.18347300 | -0.75401600 |
| N | 3.86874900  | -0.72414700 | 0.65004500  |
| N | 4.23037100  | -1.78303400 | 1.47048500  |
| O | 0.40930600  | -0.94073200 | -0.75801100 |



|    |             |             |             |
|----|-------------|-------------|-------------|
| O  | 0.00339900  | -0.14785900 | 1.97632200  |
| O  | -1.97791000 | -0.01742900 | 0.26318400  |
| O  | 2.01971100  | 0.65659100  | 0.30098400  |
| O  | -0.60040000 | 1.32533700  | -1.56239800 |
| Mo | -0.05219500 | 1.06820400  | 0.03587200  |
| O  | -1.23036400 | 2.12273500  | 1.19173800  |
| H  | -2.00055600 | 1.57726000  | 1.40768100  |
| O  | 0.85151100  | 2.74546300  | -0.02009400 |
| C  | 0.62068400  | 3.88717500  | -0.82804200 |
| H  | 1.60903400  | 4.25944200  | -1.12541200 |
| H  | 0.05541500  | 3.58293900  | -1.71973500 |
| C  | -0.13092500 | 4.98100400  | -0.07039700 |
| H  | -0.08812800 | 5.89362700  | -0.67436700 |
| H  | 0.40015400  | 5.17671600  | 0.87255700  |
| O  | -1.49113900 | 4.68248400  | 0.13559800  |
| H  | -1.52900900 | 3.85671600  | 0.64776500  |
| C  | 0.34244100  | -1.73119700 | 3.69623000  |
| H  | 0.23719800  | -2.79402600 | 3.45944100  |
| H  | 1.05854800  | -1.64521200 | 4.51592700  |
| H  | -0.62359200 | -1.33899000 | 4.00880300  |
| C  | 3.29396600  | -3.14697800 | 3.23928700  |
| H  | 3.18815200  | -2.77422500 | 4.26206100  |
| H  | 2.51841100  | -3.90205700 | 3.08227600  |
| H  | 4.26919800  | -3.62492100 | 3.14692800  |
| C  | 0.50644000  | -2.79776100 | -2.19630600 |
| H  | 0.09797500  | -3.79931000 | -2.05546300 |
| H  | 0.47164900  | -2.56856700 | -3.26585300 |
| H  | 1.54377800  | -2.76818400 | -1.86824700 |
| C  | -2.55256100 | -3.50078600 | -3.23689000 |
| H  | -1.99198700 | -3.10802300 | -4.08962200 |
| H  | -2.03124700 | -4.39409400 | -2.88112300 |
| H  | -3.54498300 | -3.79623100 | -3.57700300 |
| C  | 4.80594400  | -0.23082700 | -0.29989000 |
| C  | 5.91100000  | -1.02485500 | -0.62461100 |
| C  | 4.64347500  | 1.02504200  | -0.89470500 |
| C  | 6.84355500  | -0.56299500 | -1.54615100 |
| H  | 6.02653600  | -1.98488400 | -0.14271100 |
| C  | 5.58513300  | 1.46696100  | -1.82030200 |
| H  | 3.79527300  | 1.64010100  | -0.63555800 |
| C  | 6.68586900  | 0.68185600  | -2.15229800 |
| H  | 7.69811500  | -1.18370800 | -1.79100600 |
| H  | 5.45449400  | 2.44084800  | -2.27842700 |
| H  | 7.41473100  | 1.03683900  | -2.87163700 |
| C  | -4.87000500 | -0.63512800 | -0.11382200 |
| C  | -4.80064000 | -0.18040500 | 1.20543400  |
| C  | -6.07397300 | -0.57351100 | -0.81952100 |
| C  | -5.93658500 | 0.35851100  | 1.80344900  |
| H  | -3.87322500 | -0.25706200 | 1.75446600  |
| C  | -7.20230800 | -0.04306700 | -0.20449200 |
| H  | -6.10980900 | -0.94881700 | -1.83269200 |
| C  | -7.13871800 | 0.43127900  | 1.10462700  |
| H  | -5.87942700 | 0.71363800  | 2.82600800  |
| H  | -8.13459400 | 0.00459100  | -0.75546500 |
| H  | -8.01966800 | 0.84989000  | 1.57693400  |

#### TS(4-5)

|   |             |             |             |
|---|-------------|-------------|-------------|
| C | 2.82958800  | 2.86618400  | -1.44711200 |
| C | 0.38223000  | 2.34239200  | -0.64178400 |
| C | 1.77660200  | 2.10909600  | -0.83739700 |
| C | 2.42729500  | 1.00198900  | -0.24677600 |
| C | -1.37087500 | 0.51445800  | 2.64120900  |
| C | -2.61746200 | 0.56838600  | 1.98971200  |
| C | -2.78528600 | 0.03573400  | 0.68449900  |
| C | -3.91266100 | 1.08485200  | 2.34146200  |
| N | 3.99388700  | 2.29023800  | -1.25665700 |
| N | 3.76014500  | 1.14962300  | -0.51195200 |
| N | -4.08767300 | 0.26288000  | 0.34306700  |
| N | -4.77060400 | 0.90037700  | 1.36988100  |
| O | -0.35825400 | 1.48305200  | -0.12433700 |
| O | -0.36238600 | -0.01296300 | 2.09586300  |

|    |             |             |             |
|----|-------------|-------------|-------------|
| O  | 1.93774900  | 0.04152400  | 0.46438500  |
| O  | -1.95792800 | -0.57190800 | -0.07418400 |
| O  | 0.31472300  | -0.63805800 | -1.56282500 |
| Mo | 0.11084200  | -0.92939300 | 0.10060900  |
| O  | 1.14048100  | -2.00621000 | 1.78835000  |
| H  | 1.55601600  | -1.32823400 | 2.33106900  |
| O  | -0.61112600 | -2.68771800 | -0.09276000 |
| C  | -0.07636200 | -3.56755800 | -1.05595700 |
| H  | -0.62525500 | -4.51255100 | -1.00971800 |
| H  | -0.19216700 | -3.11673800 | -2.05080400 |
| C  | 1.41703000  | -3.71955500 | -0.71910700 |
| H  | 1.96693100  | -4.08199100 | -1.59421800 |
| H  | 1.53706900  | -4.43462100 | 0.10383300  |
| O  | 1.89079200  | -2.44822200 | -0.33946700 |
| H  | 1.80416200  | -2.35653800 | 0.84712000  |
| C  | -1.16781000 | 1.07772000  | 4.02631200  |
| H  | -1.40815600 | 2.14357500  | 4.04661500  |
| H  | -1.82111200 | 0.57715200  | 4.74516100  |
| H  | -0.12998400 | 0.93539700  | 4.32158100  |
| C  | -4.36434400 | 1.76665600  | 3.59418100  |
| H  | -4.24208900 | 1.12301900  | 4.46995800  |
| H  | -3.80139400 | 2.68595600  | 3.77909100  |
| H  | -5.41955000 | 2.02145800  | 3.49612900  |
| C  | -0.24737000 | 3.66128400  | -1.03087700 |
| H  | 0.25824700  | 4.49872300  | -0.54439800 |
| H  | -0.16868200 | 3.81033200  | -2.11123100 |
| H  | -1.29838500 | 3.64968400  | -0.74762100 |
| C  | 2.76951300  | 4.13190400  | -2.24338200 |
| H  | 2.11688600  | 4.02578000  | -3.11449800 |
| H  | 2.39406400  | 4.96948800  | -1.64917000 |
| H  | 3.77337400  | 4.37814900  | -2.58941200 |
| C  | -4.78491700 | -0.08143000 | -0.84785000 |
| C  | -6.18100300 | -0.14953000 | -0.81119600 |
| C  | -4.09897800 | -0.33015600 | -2.04113400 |
| C  | -6.88472700 | -0.47099600 | -1.96621700 |
| H  | -6.69227400 | 0.05997300  | 0.11741200  |
| C  | -4.82054500 | -0.65714200 | -3.18593600 |
| H  | -3.02150600 | -0.27109400 | -2.06966300 |
| C  | -6.21082300 | -0.73026300 | -3.15798000 |
| H  | -7.96713400 | -0.52150000 | -1.93044400 |
| H  | -4.28404600 | -0.84988500 | -4.10809700 |
| H  | -6.76348000 | -0.98347000 | -4.05532000 |
| C  | 4.86810500  | 0.33071500  | -0.15259700 |
| C  | 4.78672300  | -0.58897000 | 0.89634200  |
| C  | 6.06320500  | 0.47677400  | -0.86451300 |
| C  | 5.89815200  | -1.36327100 | 1.21645700  |
| H  | 3.86463100  | -0.70457600 | 1.44224300  |
| C  | 7.16557200  | -0.29965800 | -0.52723300 |
| H  | 6.11096700  | 1.20124500  | -1.66428900 |
| C  | 7.09072300  | -1.22524300 | 0.51175500  |
| H  | 5.82576900  | -2.07741400 | 2.02891500  |
| H  | 8.08761000  | -0.18004100 | -1.08485400 |
| H  | 7.95195600  | -1.83081700 | 0.76918000  |

## 5

|   |             |             |            |
|---|-------------|-------------|------------|
| C | 3.13102300  | 3.06544300  | 1.16787000 |
| C | 0.65078900  | 2.19945900  | 1.28256200 |
| C | 2.01881300  | 2.18448700  | 0.94501000 |
| C | 2.59204000  | 1.00173900  | 0.41544300 |
| C | -1.38905000 | -2.00579500 | 1.61832400 |
| C | -2.65100800 | -1.49639000 | 1.26424300 |
| C | -2.81148900 | -0.41961300 | 0.33340100 |
| C | -3.99151600 | -1.78024200 | 1.71375400 |
| N | 4.25537500  | 2.49233400  | 0.81368500 |
| N | 3.93618500  | 1.21747700  | 0.37167900 |
| N | -4.15019600 | -0.15258000 | 0.28626100 |
| N | -4.85734000 | -0.98844600 | 1.13920100 |
| O | -0.12512300 | 1.27480800  | 0.91922700 |
| O | -0.32691300 | -1.57835800 | 1.06845500 |
| O | 2.02585300  | -0.09843600 | 0.06938500 |

|    |             |             |             |
|----|-------------|-------------|-------------|
| O  | -1.94418100 | 0.24630800  | -0.31927600 |
| O  | 0.27137200  | 0.96397200  | -1.80326700 |
| Mo | 0.05974900  | -0.32710400 | -0.71295500 |
| O  | 2.27633000  | -3.07143300 | 1.01110800  |
| H  | 1.63580200  | -2.51383400 | 1.46951600  |
| O  | -1.12515600 | -1.49034200 | -1.76148600 |
| C  | -0.58350600 | -2.37710600 | -2.71528000 |
| H  | -1.31078100 | -3.17123900 | -2.91309200 |
| H  | -0.37671700 | -1.83590000 | -3.64786200 |
| C  | 0.70037900  | -2.87796700 | -2.07895800 |
| H  | 1.43510900  | -3.23761800 | -2.80640100 |
| H  | 0.50213300  | -3.66717700 | -1.34382200 |
| O  | 1.23262300  | -1.74473300 | -1.41520900 |
| H  | 2.25848300  | -2.67001800 | 0.13037800  |
| C  | -1.19299300 | -3.05696900 | 2.67993900  |
| H  | -1.01192900 | -2.56516800 | 3.64171700  |
| H  | -2.05244900 | -3.71375800 | 2.79046600  |
| H  | -0.30850600 | -3.64438600 | 2.43058400  |
| C  | -4.49277700 | -2.80255700 | 2.68543200  |
| H  | -4.27752100 | -3.82024900 | 2.34676800  |
| H  | -4.04455200 | -2.67698100 | 3.67450500  |
| H  | -5.57335200 | -2.69403300 | 2.77772400  |
| C  | 0.04588000  | 3.29173600  | 2.12957900  |
| H  | 0.56734600  | 3.37949500  | 3.08555900  |
| H  | 0.13301900  | 4.25255900  | 1.61497500  |
| H  | -1.00606400 | 3.07151600  | 2.30073000  |
| C  | 3.15065900  | 4.46661500  | 1.69074400  |
| H  | 2.52157900  | 5.12709500  | 1.08699100  |
| H  | 2.79077400  | 4.51881400  | 2.72216300  |
| H  | 4.17421900  | 4.84037600  | 1.66426100  |
| C  | -4.86226000 | 0.83377100  | -0.45547300 |
| C  | -6.23537700 | 0.97822000  | -0.22501400 |
| C  | -4.22278100 | 1.64326100  | -1.40176200 |
| C  | -6.95898600 | 1.92664000  | -0.93839300 |
| H  | -6.71428200 | 0.34315800  | 0.50529600  |
| C  | -4.96599800 | 2.58743800  | -2.10515200 |
| H  | -3.16518500 | 1.53687100  | -1.58267900 |
| C  | -6.33164300 | 2.73754600  | -1.88159100 |
| H  | -8.02208500 | 2.02944700  | -0.75197200 |
| H  | -4.46267100 | 3.20899500  | -2.83703000 |
| H  | -6.90011700 | 3.47583200  | -2.43516100 |
| C  | 4.97913500  | 0.35394600  | -0.07153100 |
| C  | 4.89829300  | -1.02403600 | 0.13290500  |
| C  | 6.09629300  | 0.91900600  | -0.69090400 |
| C  | 5.93960800  | -1.83588500 | -0.31008300 |
| H  | 4.04401100  | -1.46344200 | 0.62877100  |
| C  | 7.13169300  | 0.09495800  | -1.11736400 |
| H  | 6.14320400  | 1.99176900  | -0.81830600 |
| C  | 7.05598900  | -1.28502400 | -0.93438000 |
| H  | 5.87431100  | -2.90583100 | -0.14905500 |
| H  | 7.99866900  | 0.53455200  | -1.59738600 |
| H  | 7.86423700  | -1.92436600 | -1.27072300 |

## 6

|   |             |             |             |
|---|-------------|-------------|-------------|
| C | 3.21816800  | 3.04711700  | 0.77426200  |
| C | 0.72285200  | 2.23244100  | 0.95228500  |
| C | 2.09863400  | 2.15764700  | 0.64830700  |
| C | 2.66442200  | 0.91480500  | 0.27534200  |
| C | -1.35289800 | -1.61747400 | 2.05145000  |
| C | -2.59833800 | -1.13239400 | 1.61188100  |
| C | -2.74806900 | -0.34919000 | 0.42462200  |
| C | -3.92953600 | -1.22179500 | 2.15401200  |
| N | 4.33918900  | 2.42686600  | 0.49995300  |
| N | 4.01464400  | 1.11230400  | 0.19825600  |
| N | -4.08028000 | -0.04989800 | 0.33492000  |
| N | -4.78842700 | -0.58602700 | 1.40195900  |
| O | -0.05755800 | 1.27409600  | 0.71158500  |
| O | -0.29947100 | -1.45088800 | 1.36961600  |
| O | 2.09445400  | -0.21760900 | 0.09714300  |
| O | -1.88074700 | 0.07515800  | -0.40372700 |

|    |             |             |             |
|----|-------------|-------------|-------------|
| O  | 0.32124100  | 0.44635200  | -1.92730700 |
| Mo | 0.12940900  | -0.61326500 | -0.60677200 |
| O  | -1.06615600 | -1.97759400 | -1.37023400 |
| C  | -0.53263200 | -3.06826400 | -2.08560700 |
| H  | -1.24961800 | -3.89571500 | -2.06110500 |
| H  | -0.35423900 | -2.77501400 | -3.12858100 |
| C  | 0.77681900  | -3.38095600 | -1.37920000 |
| H  | 1.49710400  | -3.91058700 | -2.01142200 |
| H  | 0.60414400  | -3.96058900 | -0.46332400 |
| O  | 1.30221700  | -2.11465300 | -1.04509200 |
| C  | 3.24868900  | 4.50133000  | 1.12263300  |
| H  | 2.62802900  | 5.08807600  | 0.43947100  |
| H  | 2.88396300  | 4.68179900  | 2.13795400  |
| H  | 4.27533600  | 4.86119900  | 1.05577700  |
| C  | 0.11723300  | 3.44583900  | 1.61521400  |
| H  | 0.61758400  | 3.66477400  | 2.56152300  |
| H  | 0.23240600  | 4.32042000  | 0.96926100  |
| H  | -0.94197300 | 3.26723900  | 1.79010900  |
| C  | -1.19255300 | -2.36024400 | 3.35501000  |
| H  | -1.54269300 | -1.75539500 | 4.19457500  |
| H  | -1.77673800 | -3.28394800 | 3.34830300  |
| H  | -0.14018800 | -2.60074000 | 3.49459000  |
| C  | -4.42007000 | -1.92175700 | 3.38239500  |
| H  | -4.20387400 | -2.99325300 | 3.34915700  |
| H  | -3.95902300 | -1.52014500 | 4.28907700  |
| H  | -5.49938000 | -1.78855900 | 3.45487100  |
| C  | -4.77937400 | 0.72165700  | -0.63641000 |
| C  | -6.12341800 | 1.03311800  | -0.40002200 |
| C  | -4.15669700 | 1.15731600  | -1.81217200 |
| C  | -6.83495600 | 1.77524800  | -1.33541500 |
| H  | -6.59062800 | 0.68333700  | 0.50859500  |
| C  | -4.88680400 | 1.90114800  | -2.73528800 |
| H  | -3.12152900 | 0.91908000  | -1.99836500 |
| C  | -6.22363300 | 2.21541600  | -2.50740400 |
| H  | -7.87580600 | 2.00989300  | -1.14243200 |
| H  | -4.39660200 | 2.23363200  | -3.64333600 |
| H  | -6.78241100 | 2.79454300  | -3.23346200 |
| C  | 5.05754600  | 0.19379700  | -0.11442500 |
| C  | 6.38360800  | 0.61613400  | 0.03193500  |
| C  | 4.77705000  | -1.10069000 | -0.56850700 |
| C  | 7.42248200  | -0.25443800 | -0.27607900 |
| H  | 6.57874800  | 1.62039600  | 0.37800900  |
| C  | 5.83377300  | -1.95653500 | -0.86848700 |
| H  | 3.75528800  | -1.43091400 | -0.68110700 |
| C  | 7.15634600  | -1.54554300 | -0.72676000 |
| H  | 8.44654000  | 0.08270300  | -0.16090200 |
| H  | 5.61125400  | -2.95778900 | -1.22022800 |
| H  | 7.96952000  | -2.22135000 | -0.96546300 |

## 6b

|    |             |             |             |
|----|-------------|-------------|-------------|
| C  | -3.93787600 | -2.05827900 | -2.31523700 |
| C  | -1.40175700 | -2.23038400 | -1.62909000 |
| C  | -2.72113800 | -1.72541700 | -1.63035600 |
| C  | -3.09769500 | -0.74655600 | -0.68229800 |
| C  | 0.60617300  | -1.97533400 | 2.38464100  |
| C  | 1.90620600  | -2.01213800 | 1.85105600  |
| C  | 2.26468800  | -1.34426300 | 0.63602800  |
| C  | 3.10954000  | -2.69419700 | 2.25630100  |
| N  | -4.94221600 | -1.35707300 | -1.84881000 |
| N  | -4.43946500 | -0.54852100 | -0.84070200 |
| N  | 3.57743200  | -1.65787700 | 0.41018800  |
| N  | 4.08077700  | -2.48090900 | 1.40879200  |
| O  | -0.50586500 | -1.72000900 | -0.91029200 |
| O  | -0.30820000 | -1.26764900 | 1.86542300  |
| O  | -2.39560800 | -0.16117600 | 0.21697400  |
| O  | 1.57530000  | -0.62815700 | -0.15491200 |
| O  | -0.18317300 | 1.00932800  | -1.21658000 |
| Mo | -0.34047700 | 0.25863300  | 0.30620800  |
| O  | 1.03023300  | 1.17230000  | 1.38437600  |
| C  | 0.66229200  | 2.06767500  | 2.41391300  |

|   |             |             |             |
|---|-------------|-------------|-------------|
| H | 0.51569800  | 1.51095400  | 3.34837900  |
| H | 1.46188200  | 2.80290600  | 2.54507600  |
| C | -0.63875600 | 2.68825400  | 1.93559700  |
| H | -0.44513600 | 3.49024300  | 1.21310100  |
| H | -1.26222900 | 3.07180100  | 2.74967500  |
| O | -1.31876000 | 1.62268900  | 1.30280300  |
| P | 2.33597000  | 4.55848600  | -0.29744400 |
| C | 3.62113300  | 3.24938300  | 0.00762900  |
| H | 3.12047700  | 2.30241100  | 0.22105600  |
| H | 4.29254900  | 3.11418000  | -0.84581700 |
| H | 4.21691200  | 3.52141400  | 0.88302200  |
| C | 1.71881400  | 4.02057300  | -1.96719100 |
| H | 1.15728300  | 3.08900500  | -1.86707400 |
| H | 1.04116600  | 4.77948900  | -2.36640800 |
| H | 2.53631000  | 3.86753800  | -2.67916800 |
| C | 3.43193700  | 5.97586300  | -0.80773000 |
| H | 3.99399600  | 6.33430400  | 0.05815100  |
| H | 4.13905000  | 5.69533800  | -1.59501500 |
| H | 2.81468400  | 6.80250500  | -1.16801100 |
| C | -1.00585800 | -3.42511200 | -2.46289700 |
| H | -1.61853000 | -4.29454600 | -2.21232100 |
| H | -1.15653400 | -3.20926600 | -3.52396700 |
| H | 0.04401200  | -3.65193300 | -2.28739500 |
| C | -4.17195300 | -3.01991600 | -3.43676200 |
| H | -3.54841600 | -2.78316300 | -4.30357700 |
| H | -3.94846700 | -4.04863300 | -3.14005900 |
| H | -5.21841000 | -2.96662200 | -3.73694000 |
| C | 0.20763700  | -2.78557500 | 3.59374100  |
| H | 0.26704300  | -3.85493800 | 3.37354800  |
| H | 0.86980600  | -2.58570000 | 4.43833700  |
| H | -0.81594300 | -2.53299800 | 3.86456500  |
| C | 3.37132500  | -3.55116200 | 3.45490000  |
| H | 3.22899700  | -2.99481000 | 4.38601100  |
| H | 2.71011100  | -4.42126000 | 3.48569000  |
| H | 4.40292500  | -3.90084500 | 3.41644100  |
| C | -5.32700700 | 0.30926300  | -0.12907500 |
| C | -6.70410600 | 0.12538700  | -0.29281300 |
| C | -4.84463800 | 1.32469200  | 0.70499900  |
| C | -7.59445300 | 0.95696800  | 0.37643600  |
| H | -7.05433700 | -0.65868700 | -0.94804700 |
| C | -5.75477700 | 2.14340000  | 1.36876400  |
| H | -3.78226200 | 1.46664900  | 0.83771300  |
| C | -7.12721400 | 1.96936400  | 1.21178500  |
| H | -8.66010800 | 0.80869900  | 0.24249700  |
| H | -5.37746800 | 2.92954500  | 2.01313300  |
| H | -7.82471400 | 2.61558400  | 1.73220800  |
| C | 4.43013000  | -1.27422400 | -0.66186700 |
| C | 5.81002400  | -1.45597400 | -0.51580100 |
| C | 3.91496600  | -0.73844400 | -1.84772000 |
| C | 6.66589800  | -1.09888600 | -1.55096100 |
| H | 6.18851000  | -1.88125500 | 0.40223300  |
| C | 4.78960000  | -0.38250000 | -2.87126100 |
| H | 2.85111900  | -0.59954400 | -1.96177500 |
| C | 6.16371300  | -0.55837800 | -2.73319500 |
| H | 7.73346300  | -1.24339000 | -1.42848000 |
| H | 4.38340600  | 0.03269300  | -3.78672500 |
| H | 6.83542100  | -0.27995300 | -3.53699300 |

### TS(6-7)

|   |             |             |             |
|---|-------------|-------------|-------------|
| C | -2.89162800 | -2.18382200 | -2.53695400 |
| C | -0.40693100 | -1.45274400 | -2.04942100 |
| C | -1.80512600 | -1.51973100 | -1.87028500 |
| C | -2.42232100 | -0.72892300 | -0.86768700 |
| C | 1.86990600  | -2.58374900 | 1.04058700  |
| C | 3.04218600  | -1.91402600 | 0.63911500  |
| C | 3.05281100  | -0.53822400 | 0.24540200  |
| C | 4.41020900  | -2.34355800 | 0.49234400  |
| N | -4.04332900 | -1.85875900 | -2.00042400 |
| N | -3.76472900 | -0.97283300 | -0.96779300 |
| N | 4.35603800  | -0.25596300 | -0.08717800 |

|    |             |             |             |
|----|-------------|-------------|-------------|
| N  | 5.17066600  | -1.37043900 | 0.06537800  |
| O  | 0.33275200  | -0.83077400 | -1.24029700 |
| O  | 0.74803000  | -2.00540000 | 1.11344300  |
| O  | -1.90138600 | 0.12225600  | -0.07524300 |
| O  | 2.11625900  | 0.30886900  | 0.16368000  |
| O  | -0.03172700 | 1.83081600  | 0.39788700  |
| Mo | 0.07885500  | 0.08889700  | 0.82346500  |
| O  | 1.04205000  | 0.48409200  | 2.51499200  |
| C  | 0.61850200  | -0.21456200 | 3.65708300  |
| H  | 0.95489000  | -1.26038700 | 3.63622400  |
| H  | 1.02590500  | 0.27179100  | 4.55101400  |
| C  | -0.90436600 | -0.16163500 | 3.59354400  |
| H  | -1.27217400 | 0.82017900  | 3.92485100  |
| H  | -1.38698100 | -0.94287000 | 4.19206700  |
| O  | -1.22502000 | -0.34796700 | 2.23118900  |
| P  | -1.55549000 | 2.88165100  | -0.48378100 |
| C  | -2.99416400 | 2.97527500  | -1.66545400 |
| H  | -3.78663200 | 2.31356700  | -1.31455500 |
| H  | -3.38033600 | 3.99794900  | -1.73985000 |
| H  | -2.67468500 | 2.64129600  | -2.65413600 |
| C  | -2.26916900 | 3.51043600  | 1.08228300  |
| H  | -2.99513700 | 2.78719700  | 1.45692600  |
| H  | -1.46797200 | 3.61400400  | 1.81446000  |
| H  | -2.76259500 | 4.47549000  | 0.93754200  |
| C  | -0.45861900 | 4.23011200  | -1.07371900 |
| H  | -0.09096100 | 3.98921600  | -2.07325900 |
| H  | -0.98314800 | 5.18908400  | -1.10941500 |
| H  | 0.39637400  | 4.30324900  | -0.40189000 |
| C  | 0.27765300  | -2.11076600 | -3.22384800 |
| H  | 0.15869200  | -3.19672700 | -3.16889900 |
| H  | -0.15925200 | -1.78048300 | -4.16909600 |
| H  | 1.33781000  | -1.86475600 | -3.20355400 |
| C  | -2.86145100 | -3.15945300 | -3.67093500 |
| H  | -2.43695200 | -2.71541500 | -4.57604400 |
| H  | -2.26123300 | -4.04012300 | -3.42460100 |
| H  | -3.87935100 | -3.48353100 | -3.88805100 |
| C  | 1.87984600  | -4.04999200 | 1.41159500  |
| H  | 2.21504700  | -4.66362900 | 0.57171400  |
| H  | 2.55894100  | -4.23769300 | 2.24669200  |
| H  | 0.87072800  | -4.34578300 | 1.69361600  |
| C  | 5.03501200  | -3.67689600 | 0.76326400  |
| H  | 4.91309100  | -3.97570600 | 1.80821800  |
| H  | 4.59896900  | -4.46479300 | 0.14265600  |
| H  | 6.10106400  | -3.61392800 | 0.54444900  |
| C  | -4.82395900 | -0.43345400 | -0.19286300 |
| C  | -6.09612300 | -0.32837900 | -0.76191100 |
| C  | -4.60309700 | -0.03385000 | 1.13037300  |
| C  | -7.14602200 | 0.18610400  | -0.00786300 |
| H  | -6.24583800 | -0.66640500 | -1.77804800 |
| C  | -5.66464900 | 0.48843300  | 1.86517300  |
| H  | -3.61958900 | -0.13997600 | 1.56975400  |
| C  | -6.93580800 | 0.60295500  | 1.30500100  |
| H  | -8.13224200 | 0.26155500  | -0.45195200 |
| H  | -5.49504200 | 0.79315300  | 2.89197400  |
| H  | -7.75628400 | 1.00398100  | 1.88887800  |
| C  | 4.92730700  | 0.95394000  | -0.56200000 |
| C  | 6.23514100  | 0.92786200  | -1.06208300 |
| C  | 4.21780700  | 2.16136000  | -0.52763600 |
| C  | 6.82288200  | 2.09932000  | -1.52494900 |
| H  | 6.77173600  | -0.00945700 | -1.07115100 |
| C  | 4.82446600  | 3.32286100  | -0.99835000 |
| H  | 3.21136100  | 2.18279400  | -0.13957400 |
| C  | 6.12342900  | 3.30413200  | -1.49907200 |
| H  | 7.83664700  | 2.06624000  | -1.90867100 |
| H  | 4.26919000  | 4.25389100  | -0.96548800 |
| H  | 6.58589600  | 4.21525800  | -1.86113200 |

7

|   |             |             |             |
|---|-------------|-------------|-------------|
| C | -3.03606900 | -2.29605400 | -2.25448000 |
| C | -0.50568600 | -1.65542800 | -1.89079700 |

|    |             |             |             |
|----|-------------|-------------|-------------|
| C  | -1.91081800 | -1.60089800 | -1.69465200 |
| C  | -2.47722300 | -0.60094500 | -0.85657400 |
| C  | 1.66117200  | -2.64772300 | 1.09651000  |
| C  | 2.83081800  | -2.04731300 | 0.59426800  |
| C  | 2.88481000  | -0.65532400 | 0.30791500  |
| C  | 4.15736700  | -2.52781300 | 0.30600800  |
| N  | -4.16880800 | -1.80664200 | -1.80823400 |
| N  | -3.83634900 | -0.77226600 | -0.94424400 |
| N  | 4.17323100  | -0.39791300 | -0.08947500 |
| N  | 4.93584400  | -1.55681800 | -0.10204600 |
| O  | 0.28013100  | -0.97569700 | -1.18884500 |
| O  | 0.58570100  | -1.98576000 | 1.24854500  |
| O  | -1.90157800 | 0.35078100  | -0.23472900 |
| O  | 1.96799400  | 0.22107200  | 0.38110800  |
| O  | -0.04545100 | 2.07264500  | 0.57137000  |
| Mo | -0.03630000 | -0.00815200 | 0.97979400  |
| O  | 0.56818100  | 0.55186500  | 2.76693400  |
| C  | 0.07528500  | -0.26729800 | 3.80208500  |
| H  | 0.56499600  | -1.25115500 | 3.79109300  |
| H  | 0.26171300  | 0.20688300  | 4.77278700  |
| C  | -1.41871700 | -0.43511800 | 3.51128200  |
| H  | -1.99285300 | 0.42902300  | 3.87424400  |
| H  | -1.83753900 | -1.34202800 | 3.96245900  |
| O  | -1.55470200 | -0.49899400 | 2.10152000  |
| P  | -0.48911900 | 3.00180000  | -0.56509700 |
| C  | -0.34666900 | 2.28635700  | -2.22741000 |
| H  | -1.09276200 | 1.50299100  | -2.34246500 |
| H  | -0.48689900 | 3.05984300  | -2.98601100 |
| H  | 0.64507700  | 1.84270200  | -2.32953900 |
| C  | -2.18735000 | 3.59880800  | -0.34447700 |
| H  | -2.85421500 | 2.73714000  | -0.32595300 |
| H  | -2.25738900 | 4.12203800  | 0.61099000  |
| H  | -2.47025200 | 4.27838100  | -1.15165500 |
| C  | 0.59184700  | 4.46254500  | -0.54506500 |
| H  | 1.61548200  | 4.14828800  | -0.75594000 |
| H  | 0.27631500  | 5.19754600  | -1.28876400 |
| H  | 0.56084300  | 4.91213400  | 0.44864000  |
| C  | 0.10017400  | -2.51282000 | -2.98217700 |
| H  | 1.18280200  | -2.39708500 | -2.96505900 |
| H  | -0.15375700 | -3.56514800 | -2.82875900 |
| H  | -0.28282100 | -2.22607800 | -3.96526600 |
| C  | -3.07137800 | -3.46151700 | -3.19349400 |
| H  | -2.61172300 | -3.22268800 | -4.15695200 |
| H  | -2.54000000 | -4.32449200 | -2.78122700 |
| H  | -4.10989700 | -3.74525300 | -3.36569300 |
| C  | 1.60630500  | -4.09465600 | 1.51878000  |
| H  | 1.89283100  | -4.75540800 | 0.69698800  |
| H  | 2.29419300  | -4.28395500 | 2.34788200  |
| H  | 0.59183000  | -4.33379000 | 1.83397100  |
| C  | 4.71443600  | -3.91327900 | 0.40547000  |
| H  | 4.65938000  | -4.29963700 | 1.42708100  |
| H  | 4.17431700  | -4.61215900 | -0.24017700 |
| H  | 5.76034500  | -3.89589800 | 0.09853300  |
| C  | -4.86316100 | -0.02223300 | -0.31931500 |
| C  | -6.10457800 | 0.09534100  | -0.95091500 |
| C  | -4.64513200 | 0.57437500  | 0.92771100  |
| C  | -7.12221400 | 0.81993000  | -0.33895100 |
| H  | -6.25715000 | -0.39754000 | -1.90123300 |
| C  | -5.67132300 | 1.30671100  | 1.51886900  |
| H  | -3.69110400 | 0.44230200  | 1.42058000  |
| C  | -6.91006900 | 1.43607600  | 0.89306100  |
| H  | -8.08510500 | 0.90367700  | -0.83064600 |
| H  | -5.50294400 | 1.76435600  | 2.48765300  |
| H  | -7.70537400 | 2.00116700  | 1.36570600  |
| C  | 4.76068200  | 0.82987300  | -0.47949500 |
| C  | 5.91256900  | 0.80950600  | -1.27310000 |
| C  | 4.22045000  | 2.05180800  | -0.05995200 |
| C  | 6.51350100  | 2.00552800  | -1.64959400 |
| H  | 6.32598200  | -0.14429600 | -1.56892100 |
| C  | 4.83495200  | 3.23921900  | -0.44999100 |
| H  | 3.34114200  | 2.06324600  | 0.56760100  |

|   |            |            |             |
|---|------------|------------|-------------|
| C | 5.97841300 | 3.22724500 | -1.24571500 |
| H | 7.40708300 | 1.97929800 | -2.26328900 |
| H | 4.42281000 | 4.18276100 | -0.10833300 |
| H | 6.45203500 | 4.15696800 | -1.53929000 |

**7b**

|    |             |             |             |
|----|-------------|-------------|-------------|
| C  | -3.36206500 | 1.09879600  | 2.65985200  |
| C  | -0.80915000 | 0.79044900  | 2.18674900  |
| C  | -2.18751200 | 0.78308600  | 1.88661200  |
| C  | -2.69630700 | 0.44876700  | 0.59633800  |
| C  | 0.82366000  | 2.80136000  | -0.71175300 |
| C  | 2.17312900  | 2.46124300  | -0.46133900 |
| C  | 2.63310400  | 1.11410200  | -0.34433100 |
| C  | 3.35671400  | 3.26450600  | -0.28160300 |
| N  | -4.45156700 | 0.96797100  | 1.94818700  |
| N  | -4.06055200 | 0.57814000  | 0.67500900  |
| N  | 3.98839200  | 1.20041500  | -0.13971400 |
| N  | 4.41511700  | 2.51934800  | -0.08981200 |
| O  | 0.07172900  | 0.41452000  | 1.35932900  |
| O  | -0.08966900 | 1.94176700  | -0.84802600 |
| O  | -2.07478700 | 0.12925800  | -0.46507000 |
| O  | 2.01725100  | 0.00165900  | -0.40498700 |
| O  | -0.86121000 | -1.91960300 | 0.56108400  |
| Mo | -0.07260600 | -0.23320300 | -0.76459800 |
| O  | 0.73877700  | -1.91334200 | -1.53624100 |
| C  | 0.45095600  | -2.20349600 | -2.88694700 |
| H  | 1.21835900  | -2.87508400 | -3.29326500 |
| H  | -0.53130200 | -2.69363700 | -2.98437400 |
| C  | 0.43237700  | -0.85753300 | -3.59044500 |
| H  | -0.12591600 | -0.86286100 | -4.53261900 |
| H  | 1.45159300  | -0.49671600 | -3.78453200 |
| O  | -0.20222000 | 0.01810400  | -2.67362600 |
| P  | -0.08881300 | -3.12244600 | 1.09511100  |
| C  | -0.84467800 | -3.65807500 | 2.66446100  |
| H  | -1.89864200 | -3.88444800 | 2.49469000  |
| H  | -0.34296800 | -4.54221700 | 3.06393200  |
| H  | -0.77668800 | -2.84540000 | 3.38920500  |
| C  | -0.16161600 | -4.57249800 | -0.00056100 |
| H  | -1.20611100 | -4.79385800 | -0.22770400 |
| H  | 0.35996500  | -4.32401100 | -0.92315800 |
| H  | 0.30024300  | -5.44316400 | 0.47080900  |
| C  | 1.66016300  | -2.79248900 | 1.43442000  |
| H  | 1.73619600  | -1.96751800 | 2.14367700  |
| H  | 2.15341200  | -3.67967600 | 1.83795100  |
| H  | 2.13037100  | -2.48139600 | 0.50265200  |
| C  | -0.29559800 | 1.26399100  | 3.52947900  |
| H  | -0.64004700 | 2.27682000  | 3.75068600  |
| H  | -0.65052800 | 0.61561600  | 4.33536000  |
| H  | 0.79315200  | 1.25003900  | 3.51255200  |
| C  | -3.48622900 | 1.52073000  | 4.09121700  |
| H  | -3.05799500 | 0.77925400  | 4.77199100  |
| H  | -2.97945500 | 2.47125800  | 4.28055000  |
| H  | -4.54311300 | 1.64075600  | 4.32991800  |
| C  | 0.38169000  | 4.24146300  | -0.83633300 |
| H  | 0.69385100  | 4.83172900  | 0.02733700  |
| H  | 0.82121400  | 4.69919200  | -1.72689000 |
| H  | -0.70287300 | 4.26573400  | -0.92559000 |
| C  | 3.52425900  | 4.75240700  | -0.29055800 |
| H  | 3.19496400  | 5.19254600  | -1.23558900 |
| H  | 2.95450700  | 5.23085900  | 0.51126700  |
| H  | 4.58003100  | 4.98439000  | -0.14937700 |
| C  | -5.05038700 | 0.36419300  | -0.31875700 |
| C  | -6.39389900 | 0.30674900  | 0.07201500  |
| C  | -4.71087500 | 0.22320300  | -1.67032200 |
| C  | -7.38412200 | 0.10691600  | -0.88255100 |
| H  | -6.63936300 | 0.42851600  | 1.11689100  |
| C  | -5.71804900 | 0.02060200  | -2.61034200 |
| H  | -3.67772100 | 0.27336600  | -1.97800100 |
| C  | -7.05550100 | -0.03988700 | -2.22889500 |
| H  | -8.42099900 | 0.06534800  | -0.56746200 |



|   |             |             |             |
|---|-------------|-------------|-------------|
| H | -5.44505400 | -0.08498200 | -3.65449000 |
| H | -7.83140300 | -0.19602900 | -2.96955400 |
| C | 4.93903800  | 0.16085400  | 0.02002800  |
| C | 6.14197200  | 0.44243400  | 0.67694400  |
| C | 4.70409400  | -1.12156900 | -0.48988600 |
| C | 7.09763600  | -0.55594600 | 0.82718400  |
| H | 6.31368000  | 1.44384200  | 1.04539900  |
| C | 5.67025500  | -2.11077000 | -0.32368600 |
| H | 3.77931800  | -1.33311600 | -1.00613100 |
| C | 6.86773100  | -1.83885100 | 0.33327100  |
| H | 8.02771700  | -0.32720100 | 1.33555500  |
| H | 5.48400900  | -3.10102900 | -0.72489900 |
| H | 7.61580500  | -2.61417700 | 0.45269500  |

## 8

### TS(8-1)

|    |             |             |             |
|----|-------------|-------------|-------------|
| C  | -3.66810400 | -2.02366300 | -1.93288600 |
| C  | -1.06322900 | -1.66798900 | -1.93623900 |
| C  | -2.41354200 | -1.43424300 | -1.55653300 |
| C  | -2.76203700 | -0.43834200 | -0.61088300 |
| C  | 1.06322800  | -1.66798700 | 1.93623900  |
| C  | 2.41354100  | -1.43424200 | 1.55653300  |
| C  | 2.76203700  | -0.43834200 | 0.61088300  |
| C  | 3.66810300  | -2.02366200 | 1.93288800  |
| N  | -4.66503000 | -1.45960800 | -1.29465300 |
| N  | -4.11789100 | -0.48698300 | -0.47470300 |
| N  | 4.11789100  | -0.48698400 | 0.47470400  |
| N  | 4.66503000  | -1.45960700 | 1.29465500  |
| O  | -0.13389600 | -0.98020100 | -1.44918000 |
| O  | 0.13389600  | -0.98020000 | 1.44918000  |
| O  | -2.01888300 | 0.39718300  | 0.03163800  |
| O  | 2.01888300  | 0.39718200  | -0.03164000 |
| O  | -0.12260600 | 1.96717200  | 1.27114900  |
| Mo | 0.00000000  | 0.70954800  | 0.00000000  |
| C  | -0.06219600 | 3.72061900  | 0.70489900  |
| C  | 0.06220000  | 3.72061900  | -0.70490000 |
| O  | 0.12260700  | 1.96717200  | -1.27115000 |
| H  | 0.79979500  | 3.98775400  | 1.30388300  |
| H  | 1.01395200  | 3.99113000  | -1.14445000 |
| H  | -0.79979000 | 3.98775500  | -1.30388400 |
| H  | -1.01394800 | 3.99113200  | 1.14444900  |
| C  | -3.95728000 | -3.13053200 | -2.89744600 |
| H  | -3.60818400 | -2.88878600 | -3.90507800 |
| H  | -3.47565100 | -4.06519500 | -2.59650600 |
| H  | -5.03432700 | -3.29394000 | -2.93328100 |
| C  | -0.68959200 | -2.73642000 | -2.93312700 |
| H  | -1.05561500 | -3.71565300 | -2.61552700 |
| H  | -1.13354000 | -2.52026100 | -3.90869900 |
| H  | 0.39420100  | -2.76473600 | -3.03148000 |
| C  | 0.68959100  | -2.73641700 | 2.93312900  |
| H  | 1.05562100  | -3.71564900 | 2.61553500  |
| H  | 1.13353200  | -2.52025300 | 3.90870200  |
| H  | -0.39420300 | -2.76473800 | 3.03147500  |
| C  | 3.95728000  | -3.13052900 | 2.89745000  |
| H  | 3.60818000  | -2.88878300 | 3.90508000  |
| H  | 3.47565300  | -4.06519300 | 2.59650800  |
| H  | 5.03432700  | -3.29393500 | 2.93328700  |
| C  | 4.98328900  | 0.31024500  | -0.32811200 |
| C  | 6.35205200  | 0.30449400  | -0.04015300 |
| C  | 4.49200000  | 1.07455900  | -1.39212700 |
| C  | 7.22193400  | 1.06369300  | -0.81407500 |
| H  | 6.71265300  | -0.30104700 | 0.77851500  |
| C  | 5.37902400  | 1.83174600  | -2.15282900 |
| H  | 3.43671000  | 1.07969500  | -1.61756600 |
| C  | 6.74264200  | 1.83309800  | -1.87228900 |
| H  | 8.28137300  | 1.05308500  | -0.58407100 |
| H  | 4.99222200  | 2.42160300  | -2.97608300 |

|   |             |             |             |
|---|-------------|-------------|-------------|
| H | 7.42441500  | 2.42509200  | -2.47182900 |
| C | -4.98328900 | 0.31024600  | 0.32811200  |
| C | -6.35205200 | 0.30449400  | 0.04015300  |
| C | -4.49200000 | 1.07456100  | 1.39212600  |
| C | -7.22193400 | 1.06369400  | 0.81407500  |
| H | -6.71265400 | -0.30104800 | -0.77851400 |
| C | -5.37902400 | 1.83174900  | 2.15282800  |
| H | -3.43671000 | 1.07969700  | 1.61756400  |
| C | -6.74264200 | 1.83310000  | 1.87228700  |
| H | -8.28137300 | 1.05308600  | 0.58407100  |
| H | -4.99222100 | 2.42160700  | 2.97608000  |
| H | -7.42441400 | 2.42509500  | 2.47182700  |

### TS(1-9)

|    |             |             |             |
|----|-------------|-------------|-------------|
| C  | 3.28317100  | -1.77281800 | 2.36293800  |
| C  | 0.71682200  | -1.27037200 | 2.13884100  |
| C  | 2.07958800  | -1.29132700 | 1.73922000  |
| C  | 2.51664500  | -0.73968700 | 0.50337000  |
| C  | -1.72633400 | -2.64167300 | -1.00346200 |
| C  | -2.97820500 | -2.03074000 | -0.75365500 |
| C  | -3.12177600 | -0.64399200 | -0.45114100 |
| C  | -4.32041000 | -2.54947800 | -0.70575200 |
| N  | 4.33189500  | -1.54820500 | 1.61074200  |
| N  | 3.87189200  | -0.92107200 | 0.46169100  |
| N  | -4.45848900 | -0.43666200 | -0.24667100 |
| N  | -5.18103000 | -1.60994600 | -0.41061200 |
| O  | -0.17282900 | -0.77701500 | 1.40455600  |
| O  | -0.64618200 | -1.99297400 | -0.98459500 |
| O  | 1.85898400  | -0.15948200 | -0.43117100 |
| O  | -2.25249300 | 0.29195300  | -0.36482000 |
| O  | -0.00132600 | 1.81920900  | 0.02121200  |
| O  | -0.06862100 | 0.41073100  | -2.36741700 |
| Mo | -0.18394800 | 0.15251300  | -0.68957300 |
| P  | 1.67354000  | 2.93287400  | 0.41499500  |
| C  | 1.69325100  | 3.78663700  | -1.20965900 |
| H  | 2.26553600  | 3.18814500  | -1.92085500 |
| H  | 0.67051300  | 3.86662200  | -1.57788000 |
| H  | 2.14094000  | 4.78186600  | -1.13735700 |
| C  | 3.44876700  | 3.12368600  | 0.97743200  |
| H  | 3.55906800  | 2.70772200  | 1.98050000  |
| H  | 4.10099800  | 2.56819000  | 0.30179600  |
| H  | 3.75254200  | 4.17657400  | 0.99031000  |
| C  | 0.79067100  | 4.08415300  | 1.53957500  |
| H  | -0.26382800 | 4.09849900  | 1.26598000  |
| H  | 0.87694600  | 3.72644200  | 2.56768700  |
| H  | 1.20183200  | 5.09574800  | 1.48126300  |
| C  | -1.61254500 | -4.11696500 | -1.30655200 |
| H  | -2.03368000 | -4.71765000 | -0.49707400 |
| H  | -2.15795100 | -4.36624800 | -2.22017300 |
| H  | -0.56115300 | -4.36669800 | -1.43685600 |
| C  | -4.82574100 | -3.93937700 | -0.93701900 |
| H  | -4.57674200 | -4.29910700 | -1.93912300 |
| H  | -4.40619600 | -4.64880700 | -0.21815000 |
| H  | -5.91031000 | -3.93927500 | -0.82841000 |
| C  | 3.47388900  | -2.46423600 | 3.67678600  |
| H  | 4.53128300  | -2.69848600 | 3.80000400  |
| H  | 3.15719600  | -1.83688800 | 4.51479900  |
| H  | 2.90362800  | -3.39575100 | 3.72906000  |
| C  | 0.27515900  | -1.83670100 | 3.46834300  |
| H  | 0.49630600  | -2.90584400 | 3.52444100  |
| H  | 0.79728900  | -1.35037200 | 4.29574800  |
| H  | -0.79719800 | -1.68323800 | 3.57563700  |
| C  | 4.80710500  | -0.51280200 | -0.52733900 |
| C  | 6.15796700  | -0.41896600 | -0.17375300 |
| C  | 4.40274300  | -0.21777500 | -1.83491800 |
| C  | 7.09410200  | -0.02558500 | -1.12327300 |
| H  | 6.45240000  | -0.66758800 | 0.83565600  |
| C  | 5.35491900  | 0.18021600  | -2.77030500 |
| H  | 3.36304700  | -0.29823200 | -2.11322400 |
| C  | 6.69995900  | 0.28047300  | -2.42456900 |

|   |             |             |             |
|---|-------------|-------------|-------------|
| H | 8.13862300  | 0.04214300  | -0.84049800 |
| H | 5.03447100  | 0.40473500  | -3.78139300 |
| H | 7.43327400  | 0.58791200  | -3.16106600 |
| C | -5.15902500 | 0.76123800  | 0.07130600  |
| C | -6.55879600 | 0.73642600  | 0.06272400  |
| C | -4.48338200 | 1.94403200  | 0.39603100  |
| C | -7.27281200 | 1.88710400  | 0.37527100  |
| H | -7.06365400 | -0.18556600 | -0.18456900 |
| C | -5.21805300 | 3.08619200  | 0.70385000  |
| H | -3.40508700 | 1.96558200  | 0.40201700  |
| C | -6.60983900 | 3.06961600  | 0.69664600  |
| H | -8.35661300 | 1.85548300  | 0.36471100  |
| H | -4.68713400 | 3.99837100  | 0.95262600  |
| H | -7.17081300 | 3.96521900  | 0.93775400  |

## 9

|    |             |             |             |
|----|-------------|-------------|-------------|
| C  | 3.45051500  | -0.84133600 | 2.83935400  |
| C  | 0.87205800  | -0.73692300 | 2.41190100  |
| C  | 2.24082300  | -0.70615900 | 2.06937900  |
| C  | 2.69048300  | -0.55089300 | 0.71920300  |
| C  | -1.41109500 | -2.79375100 | -1.01380400 |
| C  | -2.68418300 | -2.24381100 | -0.75025300 |
| C  | -2.92014200 | -0.88088900 | -0.36601900 |
| C  | -3.99721000 | -2.84739900 | -0.74480900 |
| N  | 4.51221000  | -0.77420300 | 2.07940700  |
| N  | 4.06711200  | -0.60274800 | 0.77377300  |
| N  | -4.26983200 | -0.78292600 | -0.15339600 |
| N  | -4.91749300 | -1.98646800 | -0.40077400 |
| O  | -0.03453100 | -0.58286500 | 1.54494100  |
| O  | -0.32790600 | -2.13228200 | -0.97185800 |
| O  | 2.02838400  | -0.40779600 | -0.35045000 |
| O  | -2.12558300 | 0.10324800  | -0.22571900 |
| O  | 0.32548900  | 1.96910800  | 0.24765700  |
| O  | -0.03620900 | 0.57698900  | -2.21789500 |
| Mo | -0.04589700 | -0.03935100 | -0.62849300 |
| P  | 0.55472100  | 3.27323600  | -0.50932300 |
| C  | -0.88959100 | 3.77338800  | -1.49188200 |
| H  | -1.08059200 | 2.99557900  | -2.23298000 |
| H  | -1.75997800 | 3.85418600  | -0.83852800 |
| H  | -0.71521800 | 4.72821200  | -1.99286400 |
| C  | 1.96104300  | 3.19996100  | -1.65762300 |
| H  | 2.86174800  | 2.91676800  | -1.11069700 |
| H  | 1.74997100  | 2.43283900  | -2.40392800 |
| H  | 2.11664800  | 4.16313500  | -2.14899400 |
| C  | 0.89456800  | 4.60792600  | 0.67625900  |
| H  | 0.05206400  | 4.69881700  | 1.36373700  |
| H  | 1.78839800  | 4.35635000  | 1.24945500  |
| H  | 1.04922200  | 5.55981200  | 0.16383900  |
| C  | -1.24331400 | -4.25427400 | -1.36335000 |
| H  | -1.64151300 | -4.89607800 | -0.57454000 |
| H  | -1.77385000 | -4.49714400 | -2.28710500 |
| H  | -0.18231200 | -4.45715500 | -1.49504500 |
| C  | -4.42125600 | -4.24788300 | -1.06267600 |
| H  | -4.14739800 | -4.53477800 | -2.08164100 |
| H  | -3.96854400 | -4.97482000 | -0.38285500 |
| H  | -5.50488200 | -4.31198600 | -0.96368300 |
| C  | 3.63283900  | -1.03487100 | 4.31274600  |
| H  | 4.69958300  | -1.09359100 | 4.52976100  |
| H  | 3.20619200  | -0.20657100 | 4.88584300  |
| H  | 3.15620400  | -1.95505400 | 4.66191900  |
| C  | 0.41415900  | -0.97063400 | 3.83416700  |
| H  | 0.74790100  | -1.94586100 | 4.19832700  |
| H  | 0.82052300  | -0.21199000 | 4.50734100  |
| H  | -0.67344900 | -0.92957600 | 3.86042900  |
| C  | 5.02011200  | -0.47051600 | -0.26603700 |
| C  | 6.37483900  | -0.34851800 | 0.07195900  |
| C  | 4.63928000  | -0.46550900 | -1.61522200 |
| C  | 7.33048200  | -0.21867400 | -0.92856400 |
| H  | 6.65469800  | -0.36524200 | 1.11501900  |
| C  | 5.61276500  | -0.33019400 | -2.60218100 |

|   |             |             |             |
|---|-------------|-------------|-------------|
| H | 3.59931500  | -0.57168600 | -1.88127800 |
| C | 6.95927300  | -0.20521100 | -2.27194300 |
| H | 8.37510300  | -0.12724300 | -0.65174400 |
| H | 5.30607500  | -0.33087500 | -3.64246900 |
| H | 7.70874000  | -0.10374600 | -3.04842500 |
| C | -5.03994000 | 0.34499300  | 0.23484900  |
| C | -6.42210100 | 0.32135700  | 0.01703900  |
| C | -4.44721200 | 1.45726200  | 0.84486700  |
| C | -7.20133700 | 1.40644100  | 0.40178200  |
| H | -6.86395400 | -0.55212500 | -0.44010900 |
| C | -5.24441600 | 2.53557500  | 1.21995700  |
| H | -3.38213200 | 1.46855500  | 1.01804300  |
| C | -6.61974600 | 2.52135500  | 1.00193700  |
| H | -8.27136600 | 1.37735700  | 0.22877200  |
| H | -4.78023900 | 3.39141200  | 1.69803100  |
| H | -7.23143400 | 3.36505600  | 1.30021500  |

## 10

|    |             |             |             |
|----|-------------|-------------|-------------|
| C  | 3.59359000  | -2.79145200 | -0.47917100 |
| C  | 1.10353100  | -2.76086500 | 0.29460200  |
| C  | 2.35673000  | -2.20083100 | -0.02742300 |
| C  | 2.62413400  | -0.79645200 | -0.00747800 |
| C  | -1.10358500 | 2.76080100  | 0.29513700  |
| C  | -2.35673400 | 2.20084100  | -0.02720900 |
| C  | -2.62414000 | 0.79645700  | -0.00762400 |
| C  | -3.59352700 | 2.79156300  | -0.47901000 |
| N  | 4.49759200  | -1.87628400 | -0.70589500 |
| N  | 3.91272000  | -0.64725200 | -0.42584700 |
| N  | -3.91266400 | 0.64735100  | -0.42621900 |
| O  | -4.49749300 | 1.87644600  | -0.70608000 |
| O  | 0.11245600  | -2.06510800 | 0.68136100  |
| O  | -0.11256100 | 2.06495400  | 0.68186400  |
| O  | 1.86231200  | 0.19127700  | 0.29755400  |
| O  | -1.86236300 | -0.19134000 | 0.29729600  |
| O  | -0.00016700 | -0.00035200 | 2.91434700  |
| Mo | -0.00007900 | -0.00014400 | 1.23023800  |
| C  | -0.84354500 | 4.24256200  | 0.18368700  |
| H  | -0.92890900 | 4.57198300  | -0.85516800 |
| H  | -1.56539800 | 4.81318200  | 0.77131400  |
| H  | 0.16239200  | 4.44793700  | 0.54444500  |
| C  | -3.95268200 | 4.22772400  | -0.69748300 |
| H  | -3.86881700 | 4.80868000  | 0.22525700  |
| H  | -3.30803100 | 4.69827400  | -1.44455800 |
| H  | -4.98375600 | 4.28058600  | -1.04651200 |
| C  | 0.84350200  | -4.24259600 | 0.18274800  |
| H  | 0.92914700  | -4.57179500 | -0.85615300 |
| H  | 1.56519100  | -4.81335000 | 0.77045000  |
| H  | -0.16253200 | -4.44804000 | 0.54319500  |
| C  | 3.95277700  | -4.22756500 | -0.69790500 |
| H  | 3.86874300  | -4.80872800 | 0.22469000  |
| H  | 3.30825300  | -4.69794200 | -1.44519900 |
| H  | 4.98391100  | -4.28035400 | -1.04676500 |
| C  | -4.69244300 | -0.53533100 | -0.58617100 |
| C  | -6.05385900 | -0.39893000 | -0.88071100 |
| C  | -4.12667400 | -1.80967600 | -0.46082500 |
| C  | -6.84072800 | -1.53243800 | -1.04700700 |
| H  | -6.47266500 | 0.59158900  | -0.97824600 |
| C  | -4.93376500 | -2.93195100 | -0.62871400 |
| H  | -3.07809700 | -1.91616400 | -0.23159700 |
| C  | -6.28850300 | -2.80534000 | -0.92179300 |
| H  | -7.89419500 | -1.41532700 | -1.27490900 |
| H  | -4.48937000 | -3.91580700 | -0.52819300 |
| H  | -6.90649600 | -3.68628800 | -1.05104400 |
| C  | 4.69252300  | 0.53546700  | -0.58541200 |
| C  | 6.05399700  | 0.39913300  | -0.87971800 |
| C  | 4.12672100  | 1.80978200  | -0.45992100 |
| C  | 6.84089000  | 1.53267900  | -1.04563800 |
| H  | 6.47282700  | -0.59136300 | -0.97737200 |
| C  | 4.93383500  | 2.93209600  | -0.62743200 |
| H  | 3.07809900  | 1.91621600  | -0.23087100 |

|   |            |            |             |
|---|------------|------------|-------------|
| C | 6.28863100 | 2.80555300 | -0.92027700 |
| H | 7.89440100 | 1.41562100 | -1.27336200 |
| H | 4.48941500 | 3.91592900 | -0.52680000 |
| H | 6.90664200 | 3.68653100 | -1.04923400 |

# 11

|    |             |             |             |
|----|-------------|-------------|-------------|
| C  | 3.47974400  | -1.38439400 | -2.22701700 |
| C  | 1.08554700  | -2.01693200 | -1.39186600 |
| C  | 2.23009300  | -1.20535900 | -1.52548200 |
| C  | 2.33700400  | 0.10028800  | -0.95207600 |
| C  | -1.61320000 | 2.59974200  | 1.26095600  |
| C  | -2.84618500 | 2.08961700  | 0.80802900  |
| C  | -2.99035300 | 0.81323600  | 0.18074600  |
| C  | -4.17846800 | 2.64436800  | 0.79317800  |
| N  | 4.23981400  | -0.32831400 | -2.11173000 |
| N  | 3.54636400  | 0.59274500  | -1.33601400 |
| N  | -4.30625800 | 0.69502600  | -0.14947600 |
| N  | -5.02470800 | 1.82096200  | 0.23472600  |
| O  | 0.04173300  | -1.63429900 | -0.76619200 |
| O  | -0.52461700 | 1.94544800  | 1.18707000  |
| O  | 1.51428500  | 0.75545300  | -0.20985500 |
| O  | -2.11157500 | -0.08614400 | -0.08372900 |
| O  | 0.09335800  | -0.92836700 | 2.12787500  |
| Mo | -0.16761400 | -0.09745500 | 0.67114800  |
| C  | 2.74124600  | -3.40567800 | 2.25606900  |
| H  | 3.46335100  | -4.08055700 | 1.79139600  |
| H  | 3.17708100  | -2.39918500 | 2.26276700  |
| O  | 1.55565500  | -3.46292500 | 1.47220500  |
| H  | 0.95742800  | -2.77006900 | 1.78568500  |
| C  | 2.49236600  | -3.85417400 | 3.69023400  |
| H  | 1.77117600  | -3.17129000 | 4.16244800  |
| H  | 2.05246200  | -4.86055400 | 3.67634800  |
| O  | 3.74859400  | -3.83314600 | 4.36327800  |
| H  | 3.60241500  | -4.08011400 | 5.28006500  |
| C  | -1.49517000 | 3.97923100  | 1.85861600  |
| H  | -1.77395700 | 4.74313500  | 1.12833100  |
| H  | -2.15719800 | 4.08926800  | 2.72023600  |
| H  | -0.46482400 | 4.13783500  | 2.17071400  |
| C  | -4.68309500 | 3.95452100  | 1.31072200  |
| H  | -4.52265500 | 4.05108200  | 2.38816100  |
| H  | -4.18859200 | 4.80020900  | 0.82544300  |
| H  | -5.75302200 | 4.01911000  | 1.11379100  |
| C  | 1.00030500  | -3.41110700 | -1.93974400 |
| H  | 1.66636600  | -3.59635800 | -2.77761700 |
| H  | 1.26227000  | -4.08103500 | -1.11291600 |
| H  | -0.03180300 | -3.61714900 | -2.22310800 |
| C  | 3.99269800  | -2.54639800 | -3.01899000 |
| H  | 4.01229300  | -3.46245900 | -2.42345600 |
| H  | 3.37907000  | -2.73439000 | -3.90485200 |
| H  | 5.00727900  | -2.32119300 | -3.34745200 |
| C  | -4.99987800 | -0.37918600 | -0.78165600 |
| C  | -6.39262200 | -0.29667800 | -0.89171000 |
| C  | -4.32105900 | -1.49477400 | -1.28623500 |
| C  | -7.09841300 | -1.32717800 | -1.50124900 |
| H  | -6.89935400 | 0.57283900  | -0.50045900 |
| C  | -5.04819600 | -2.51709600 | -1.89050100 |
| H  | -3.24764200 | -1.56019100 | -1.20351100 |
| C  | -6.43348300 | -2.44376700 | -2.00320400 |
| H  | -8.17712400 | -1.25352400 | -1.58092900 |
| H  | -4.51634500 | -3.37926200 | -2.27669600 |
| H  | -6.98843400 | -3.24573700 | -2.47600700 |
| C  | 4.16474300  | 1.84323100  | -1.04107300 |
| C  | 5.48080700  | 2.05037500  | -1.46991700 |
| C  | 3.48733200  | 2.85248300  | -0.34636400 |
| C  | 6.11154400  | 3.25957900  | -1.20242600 |
| H  | 5.98718400  | 1.26248300  | -2.00716700 |
| C  | 4.13891300  | 4.05549600  | -0.08701200 |
| H  | 2.47412300  | 2.69391600  | -0.01249500 |
| C  | 5.44746800  | 4.26958000  | -0.50983100 |
| H  | 7.13127900  | 3.40897300  | -1.53889100 |

|   |            |            |             |
|---|------------|------------|-------------|
| H | 3.60884800 | 4.83172400 | 0.45344300  |
| H | 5.94405700 | 5.21036000 | -0.30242000 |

**TS(11-12)**

|    |             |             |             |
|----|-------------|-------------|-------------|
| C  | -3.93020900 | -2.91053700 | 0.47901300  |
| C  | -1.34194300 | -2.85849500 | 0.21390500  |
| C  | -2.63573700 | -2.32123700 | 0.21857300  |
| C  | -2.92495400 | -0.93784200 | -0.03884600 |
| C  | 0.94418800  | 1.05570400  | 2.02018100  |
| C  | 2.28626700  | 0.79357700  | 1.73321700  |
| C  | 2.67672100  | 0.00407100  | 0.60195600  |
| C  | 3.53128000  | 1.10389800  | 2.39739000  |
| N  | -4.87834000 | -2.01898400 | 0.39187500  |
| N  | -4.27739400 | -0.80455900 | 0.07784600  |
| N  | 4.03497200  | -0.11072200 | 0.66500000  |
| N  | 4.54213800  | 0.57661700  | 1.76332900  |
| O  | -2.14018300 | 0.02764500  | -0.30924200 |
| O  | -0.00370700 | 0.66195500  | 1.24922200  |
| O  | -0.29317500 | -2.16297400 | -0.03636800 |
| O  | 1.94244400  | -0.53678600 | -0.28517400 |
| O  | -0.06491700 | 0.02186500  | -2.47931500 |
| Mo | -0.08271300 | -0.15682100 | -0.66382400 |
| C  | 1.10695000  | 2.84489800  | -0.97042600 |
| H  | 1.15943300  | 3.07094400  | 0.10412600  |
| H  | 2.08596600  | 2.43020800  | -1.26182500 |
| O  | 0.04513800  | 1.97560300  | -1.25785700 |
| H  | 0.01470600  | 1.07911800  | -2.43533800 |
| C  | 0.89573700  | 4.16242500  | -1.70671400 |
| H  | 0.91209900  | 3.97925800  | -2.79020400 |
| H  | -0.09516600 | 4.55472100  | -1.44175100 |
| O  | 1.94035500  | 5.05122100  | -1.31033300 |
| H  | 1.83622600  | 5.87032200  | -1.80133000 |
| C  | -1.07604700 | -4.31338000 | 0.50654700  |
| H  | -1.54014500 | -4.62498200 | 1.44375300  |
| H  | -1.48472500 | -4.94155300 | -0.28996500 |
| H  | 0.00000700  | -4.46674800 | 0.56072100  |
| C  | -4.29590700 | -4.32285300 | 0.81147600  |
| H  | -3.96551300 | -5.01962200 | 0.03658400  |
| H  | -3.84993900 | -4.64360900 | 1.75716200  |
| H  | -5.37987400 | -4.39111900 | 0.90136900  |
| C  | 3.79129600  | 1.91638400  | 3.62642200  |
| H  | 3.35926200  | 2.91701300  | 3.54477000  |
| H  | 3.37384600  | 1.44218500  | 4.51972700  |
| H  | 4.86857900  | 2.01070500  | 3.76208000  |
| C  | 0.48203900  | 1.79962700  | 3.24131300  |
| H  | 1.19170500  | 1.75641100  | 4.06389600  |
| H  | 0.32266400  | 2.84931500  | 2.97213800  |
| H  | -0.48085200 | 1.39370600  | 3.55310800  |
| C  | -5.09804300 | 0.35078600  | -0.07720100 |
| C  | -6.48018500 | 0.21276300  | 0.09617900  |
| C  | -4.55185700 | 1.60066500  | -0.39470800 |
| C  | -7.30752200 | 1.32007900  | -0.04884300 |
| H  | -6.88458700 | -0.75827100 | 0.34007800  |
| C  | -5.39959200 | 2.69651100  | -0.53450000 |
| H  | -3.48740800 | 1.71247000  | -0.52931900 |
| C  | -6.77510300 | 2.56814400  | -0.36460500 |
| H  | -8.37675200 | 1.20175300  | 0.08633600  |
| H  | -4.96929900 | 3.66037200  | -0.78166100 |
| H  | -7.42445200 | 3.42851100  | -0.47803400 |
| C  | 4.93864800  | -0.78842900 | -0.20162800 |
| C  | 6.30810000  | -0.73156700 | 0.08183300  |
| C  | 4.48315600  | -1.50252100 | -1.31621000 |
| C  | 7.21119900  | -1.38599100 | -0.74755700 |
| H  | 6.64304600  | -0.17550100 | 0.94473100  |
| C  | 5.40475500  | -2.15112200 | -2.13388000 |
| H  | 3.42878100  | -1.54757500 | -1.53770200 |
| C  | 6.76819800  | -2.09962200 | -1.85917000 |
| H  | 8.26993600  | -1.33438700 | -0.51978600 |
| H  | 5.04358900  | -2.70036800 | -2.99597900 |
| H  | 7.47693600  | -2.60709300 | -2.50318400 |

|    |             |             |             |
|----|-------------|-------------|-------------|
| C  | -3.93378000 | -2.70641600 | -0.73732000 |
| C  | -1.33128900 | -2.61467800 | -0.99608600 |
| C  | -2.62929300 | -2.09958900 | -0.74314200 |
| C  | -2.87348700 | -0.74126700 | -0.39663700 |
| C  | 0.85652100  | -0.55139900 | 2.41714900  |
| C  | 2.22854400  | -0.58384700 | 2.06593900  |
| C  | 2.65724200  | -0.37285200 | 0.73235500  |
| C  | 3.44524800  | -0.82528600 | 2.79214400  |
| N  | -4.86065300 | -1.83444100 | -0.42762300 |
| N  | -4.22216500 | -0.62446200 | -0.21274400 |
| N  | 4.01724900  | -0.49163800 | 0.72666800  |
| N  | 4.48730000  | -0.76310200 | 1.99865300  |
| O  | -2.06093000 | 0.24732400  | -0.26773600 |
| O  | -0.01793500 | -0.28177900 | 1.54289100  |
| O  | -0.30685500 | -1.87978200 | -0.96293500 |
| O  | 1.94328500  | -0.12108000 | -0.31173900 |
| O  | -0.16784600 | 0.53486300  | -2.42282700 |
| Mo | -0.02610900 | 0.22252600  | -0.53106400 |
| C  | 0.83949300  | 3.06262100  | -0.87833900 |
| H  | 1.84481100  | 2.67755200  | -1.09361500 |
| H  | 0.36240100  | 3.28647200  | -1.84553800 |
| O  | 0.07173900  | 2.12941600  | -0.14740100 |
| H  | -0.44378300 | 1.42024400  | -2.69913400 |
| C  | 0.93704900  | 4.35564000  | -0.08185800 |
| H  | -0.07798500 | 4.70752700  | 0.14479700  |
| H  | 1.44923900  | 4.15262000  | 0.86813500  |
| O  | 1.65710400  | 5.28790500  | -0.88314600 |
| H  | 1.75298700  | 6.10244600  | -0.38288200 |
| C  | -1.10279200 | -4.07130500 | -1.31497600 |
| H  | -1.54854200 | -4.72065900 | -0.55869200 |
| H  | -1.55573500 | -4.32600600 | -2.27727300 |
| H  | -0.03085600 | -4.25280200 | -1.37045100 |
| C  | -4.34050400 | -4.11896600 | -1.01929400 |
| H  | -4.03851700 | -4.43520500 | -2.02140900 |
| H  | -3.89736500 | -4.81850800 | -0.30488500 |
| H  | -5.42542300 | -4.19222400 | -0.94442100 |
| C  | 3.64761700  | -1.11751200 | 4.24529200  |
| H  | 3.25517400  | -0.31445800 | 4.87527700  |
| H  | 3.14919400  | -2.04429900 | 4.54319700  |
| H  | 4.71493600  | -1.22188700 | 4.43999200  |
| C  | 0.36880100  | -0.83783200 | 3.81301100  |
| H  | 0.70773200  | -1.81781400 | 4.15825200  |
| H  | 0.75160200  | -0.09166400 | 4.51499100  |
| H  | -0.71942200 | -0.80580200 | 3.82020600  |
| C  | -5.00354300 | 0.51536100  | 0.13356300  |
| C  | -6.39812800 | 0.40083300  | 0.09739000  |
| C  | -4.41028800 | 1.72596100  | 0.51205800  |
| C  | -7.18983600 | 1.49152700  | 0.43665200  |
| H  | -6.83844000 | -0.54188000 | -0.19174900 |
| C  | -5.22211100 | 2.80660400  | 0.84706900  |
| H  | -3.33597200 | 1.81982300  | 0.53978800  |
| C  | -6.60962400 | 2.70114700  | 0.81253300  |
| H  | -8.26896900 | 1.39133600  | 0.40446300  |
| H  | -4.75486200 | 3.74044200  | 1.13889900  |
| H  | -7.23111500 | 3.54958400  | 1.07466100  |
| C  | 4.94467300  | -0.34745600 | -0.34391100 |
| C  | 6.30416200  | -0.22399600 | -0.03810200 |
| C  | 4.52107900  | -0.33912600 | -1.67739200 |
| C  | 7.23121800  | -0.08978700 | -1.06480400 |
| H  | 6.61271100  | -0.24226600 | 0.99692000  |
| C  | 5.46506300  | -0.19825000 | -2.69129900 |
| H  | 3.47424600  | -0.43982200 | -1.91922900 |
| C  | 6.81958700  | -0.07309200 | -2.39595200 |
| H  | 8.28274800  | 0.00526500  | -0.81852900 |
| H  | 5.12940300  | -0.19091900 | -3.72201000 |
| H  | 7.54603100  | 0.03514800  | -3.19288800 |

**13**

|    |             |             |             |
|----|-------------|-------------|-------------|
| C  | -3.55123300 | -2.41860100 | -1.69827800 |
| C  | -0.97741500 | -2.04648700 | -1.39387700 |
| C  | -2.34531000 | -1.76032500 | -1.26276400 |
| C  | -2.81077300 | -0.63367200 | -0.52428700 |
| C  | 0.99021100  | -1.18384900 | 2.40330100  |
| C  | 2.29391700  | -1.09570200 | 1.84104100  |
| C  | 2.64066100  | -0.36589800 | 0.65942800  |
| C  | 3.54536700  | -1.67702600 | 2.26794800  |
| N  | -4.61185800 | -1.77796800 | -1.28201200 |
| N  | -4.17660200 | -0.68131900 | -0.55211600 |
| N  | 3.98167900  | -0.53836600 | 0.48194600  |
| N  | 4.52535000  | -1.34718600 | 1.46582600  |
| O  | -0.09121900 | -1.27576500 | -0.89002500 |
| O  | -0.02531800 | -0.61290800 | 1.91639100  |
| O  | -2.11562500 | 0.24697300  | 0.08613200  |
| O  | 1.93289600  | 0.33832300  | -0.14924300 |
| O  | -0.26303200 | 1.47775600  | -1.70197700 |
| O  | 0.24709100  | 2.14414600  | 1.03532100  |
| Mo | -0.11241900 | 0.59072600  | 0.07558800  |
| H  | 0.45068900  | 1.17786300  | -2.28127600 |
| C  | 1.03612300  | 3.31375200  | 1.16341800  |
| H  | 2.08981500  | 3.02127800  | 1.09009400  |
| H  | 0.84802100  | 3.73155800  | 2.15903400  |
| C  | 0.70116800  | 4.33357400  | 0.07815500  |
| H  | -0.36984700 | 4.57356300  | 0.13578400  |
| H  | 1.26098300  | 5.25053500  | 0.29167900  |
| O  | 1.07600700  | 3.89628100  | -1.20878900 |
| H  | 0.47072200  | 3.17727500  | -1.46899300 |
| C  | -3.71890100 | -3.65705900 | -2.52020700 |
| H  | -3.22660000 | -3.56448200 | -3.49211000 |
| H  | -3.29848300 | -4.53340600 | -2.01874500 |
| H  | -4.78225600 | -3.83088100 | -2.68426400 |
| C  | -0.46324200 | -3.26401300 | -2.11625700 |
| H  | -0.89920700 | -4.17979200 | -1.71060500 |
| H  | -0.72125400 | -3.21847100 | -3.17799200 |
| H  | 0.62016000  | -3.30249500 | -2.01654700 |
| C  | 3.86066000  | -2.55247300 | 3.44151400  |
| H  | 3.61778900  | -2.06639400 | 4.39005100  |
| H  | 3.31188900  | -3.49742800 | 3.40507800  |
| H  | 4.92809600  | -2.77251600 | 3.42980200  |
| C  | 0.73844900  | -1.99144900 | 3.65622200  |
| H  | 1.03208300  | -3.03460400 | 3.52016300  |
| H  | 1.31180500  | -1.59505200 | 4.49756200  |
| H  | -0.32307000 | -1.94017800 | 3.89056400  |
| C  | 4.82726200  | -0.03763700 | -0.54879200 |
| C  | 6.04282800  | -0.68906600 | -0.78361800 |
| C  | 4.47617400  | 1.08750900  | -1.30374100 |
| C  | 6.89779200  | -0.21897200 | -1.77340000 |
| H  | 6.30330100  | -1.54588200 | -0.17906900 |
| C  | 5.34373300  | 1.53982600  | -2.29494200 |
| H  | 3.54350400  | 1.60088000  | -1.12650200 |
| C  | 6.55310700  | 0.89446000  | -2.53727200 |
| H  | 7.83812100  | -0.72974700 | -1.94771000 |
| H  | 5.06566200  | 2.41267800  | -2.87457300 |
| H  | 7.22190600  | 1.25719900  | -3.30922500 |
| C  | -5.13826900 | 0.19680700  | 0.02009400  |
| C  | -6.49674500 | -0.07383500 | -0.18148900 |
| C  | -4.75192400 | 1.31159200  | 0.77314600  |
| C  | -7.45633100 | 0.76816000  | 0.36760600  |
| H  | -6.77825500 | -0.93771300 | -0.76505000 |
| C  | -5.72920100 | 2.14257400  | 1.31453900  |
| H  | -3.70694700 | 1.52589400  | 0.93178000  |
| C  | -7.08189100 | 1.88067500  | 1.11833100  |
| H  | -8.50566000 | 0.54956300  | 0.20433900  |
| H  | -5.42046200 | 3.00420800  | 1.89560400  |
| H  | -7.83457400 | 2.53428100  | 1.54351500  |

**TS(13-14)**

|   |            |            |             |
|---|------------|------------|-------------|
| C | 3.14324700 | 3.13308500 | -0.46748000 |
|---|------------|------------|-------------|



|    |             |             |             |
|----|-------------|-------------|-------------|
| C  | 0.63462700  | 2.34703100  | -0.66715300 |
| C  | 2.01963500  | 2.23127200  | -0.49680000 |
| C  | 2.59357900  | 0.94163600  | -0.31028500 |
| C  | -0.91434500 | -0.19530000 | 2.43278400  |
| C  | -2.24056300 | 0.00185200  | 2.00750700  |
| C  | -2.67741500 | -0.04369900 | 0.63590300  |
| C  | -3.44374900 | 0.28868600  | 2.75606200  |
| N  | 4.26140600  | 2.47676600  | -0.29020500 |
| N  | 3.94450800  | 1.13020900  | -0.19982500 |
| N  | -4.02673800 | 0.21314100  | 0.66989700  |
| N  | -4.47778400 | 0.40686800  | 1.96915600  |
| O  | -0.11607100 | 1.31723800  | -0.63812800 |
| O  | 0.04886500  | -0.48697200 | 1.65242800  |
| O  | 2.02200700  | -0.18957500 | -0.24750600 |
| O  | -2.04067600 | -0.25815300 | -0.43522600 |
| O  | 0.32939500  | -1.11843100 | -2.54153100 |
| O  | -0.92241100 | -2.44519600 | -0.23403600 |
| Mo | 0.05241000  | -0.81208500 | -0.45137000 |
| H  | -0.42764100 | -1.24069600 | -3.12112800 |
| C  | -0.48032800 | -3.76540500 | -0.49662600 |
| H  | -0.90488500 | -4.06816600 | -1.46350900 |
| H  | -0.87800600 | -4.43628100 | 0.27235500  |
| C  | 1.04442500  | -3.73304900 | -0.53645000 |
| H  | 1.45950100  | -3.82448000 | 0.47346700  |
| H  | 1.44897600  | -4.54637900 | -1.15221400 |
| O  | 1.40988900  | -2.47857500 | -1.06126900 |
| H  | 0.92705200  | -2.04713400 | -2.13960000 |
| C  | -4.96409100 | 0.27460800  | -0.39508200 |
| C  | -6.33024700 | 0.27362100  | -0.08773700 |
| C  | -4.55183100 | 0.34953700  | -1.73126200 |
| C  | -7.26988000 | 0.34180400  | -1.10959900 |
| H  | -6.63297100 | 0.22680200  | 0.94798800  |
| C  | -5.50874800 | 0.41343500  | -2.74074400 |
| H  | -3.49939200 | 0.35570900  | -1.96628900 |
| C  | -6.86846600 | 0.40931000  | -2.44218500 |
| H  | -8.32470200 | 0.34000600  | -0.85819800 |
| H  | -5.18003800 | 0.47177700  | -3.77260900 |
| H  | -7.60509800 | 0.46009400  | -3.23565400 |
| C  | 4.97922600  | 0.17598200  | 0.00241600  |
| C  | 6.24113100  | 0.63052500  | 0.40014300  |
| C  | 4.75299300  | -1.19069500 | -0.20159800 |
| C  | 7.27168200  | -0.28154300 | 0.59559000  |
| H  | 6.39686700  | 1.69033400  | 0.54106300  |
| C  | 5.79883800  | -2.08691100 | 0.00528200  |
| H  | 3.78097300  | -1.54662500 | -0.51222100 |
| C  | 7.05791300  | -1.64492900 | 0.40274700  |
| H  | 8.24702100  | 0.07931900  | 0.90249700  |
| H  | 5.62018700  | -3.14444000 | -0.15437500 |
| H  | 7.86393600  | -2.35296800 | 0.55765600  |
| C  | -0.52184600 | -0.07926000 | 3.88808900  |
| H  | -0.84395000 | 0.87078700  | 4.31772500  |
| H  | -0.97844600 | -0.88078900 | 4.47491700  |
| H  | 0.56100900  | -0.16367300 | 3.95920200  |
| C  | -3.65010000 | 0.45749700  | 4.22962900  |
| H  | -3.33599200 | -0.42790300 | 4.78855800  |
| H  | -3.09226200 | 1.31146500  | 4.62385200  |
| H  | -4.71123600 | 0.62624600  | 4.41303900  |
| C  | 3.18793000  | 4.62206700  | -0.60788200 |
| H  | 2.76981600  | 4.94882300  | -1.56416200 |
| H  | 2.62665200  | 5.11867600  | 0.18921400  |
| H  | 4.22618700  | 4.94960000  | -0.55392400 |
| C  | -0.07621200 | 3.65127200  | -0.90959300 |
| H  | 0.55868800  | 4.52077500  | -0.75694900 |
| H  | -0.45064000 | 3.66223000  | -1.93775800 |
| H  | -0.94498200 | 3.70831400  | -0.25044800 |

14

|   |            |            |             |
|---|------------|------------|-------------|
| C | 3.36998600 | 2.41522600 | -1.65364600 |
| C | 0.82022200 | 1.79685500 | -1.62775300 |
| C | 2.19581500 | 1.64263200 | -1.34178500 |

|    |             |             |             |
|----|-------------|-------------|-------------|
| C  | 2.68815900  | 0.54995800  | -0.57874700 |
| C  | -0.84292000 | 1.17762600  | 2.13907700  |
| C  | -2.19265300 | 1.16336100  | 1.74668900  |
| C  | -2.67089700 | 0.32635400  | 0.69384600  |
| C  | -3.36598300 | 1.85108500  | 2.22218000  |
| N  | 4.44608900  | 1.86724400  | -1.14679700 |
| N  | 4.04264200  | 0.72327700  | -0.47707300 |
| N  | -4.01944600 | 0.55009200  | 0.61350800  |
| N  | -4.42792300 | 1.48765700  | 1.55137700  |
| O  | -0.02550600 | 0.94280700  | -1.23132800 |
| O  | 0.03492000  | 0.44856100  | 1.57960400  |
| O  | 2.05600900  | -0.44171500 | -0.06906700 |
| O  | -2.05117600 | -0.50414000 | -0.04651600 |
| O  | 0.90560200  | -1.39761100 | -2.31266200 |
| O  | -0.84700100 | -2.49655400 | -0.93589100 |
| Mo | 0.03712600  | -0.85473500 | -0.07788600 |
| H  | 0.22668700  | -2.10486700 | -2.29064200 |
| C  | -1.02394100 | -3.63387000 | -0.12004700 |
| H  | -0.98810600 | -4.54221300 | -0.73492000 |
| H  | -2.01259300 | -3.58622200 | 0.35882600  |
| C  | 0.07935000  | -3.61370900 | 0.92713000  |
| H  | -0.18653700 | -4.15219100 | 1.84270600  |
| H  | 1.01625800  | -4.03664000 | 0.53926400  |
| O  | 0.30320300  | -2.24112600 | 1.23769200  |
| H  | 1.75403300  | -1.84235200 | -2.19778600 |
| C  | 0.28163400  | 2.96807600  | -2.40878200 |
| H  | 0.64097700  | 3.91843700  | -2.00915900 |
| H  | 0.60262100  | 2.90520500  | -3.45289800 |
| H  | -0.80641900 | 2.94337200  | -2.37565100 |
| C  | 3.49891300  | 3.68650900  | -2.43266600 |
| H  | 3.10288300  | 3.58096500  | -3.44631100 |
| H  | 2.96145900  | 4.50963900  | -1.95289000 |
| H  | 4.55327700  | 3.95564700  | -2.49630800 |
| C  | -0.33732700 | 2.04800200  | 3.26216000  |
| H  | -0.66915700 | 3.08144000  | 3.14948600  |
| H  | -0.71339200 | 1.68077900  | 4.22158900  |
| H  | 0.75051600  | 2.00839400  | 3.27485100  |
| C  | -3.50925100 | 2.86426800  | 3.31409800  |
| H  | -3.16275400 | 2.47497000  | 4.27532300  |
| H  | -2.93724100 | 3.77183600  | 3.10005100  |
| H  | -4.56117000 | 3.13421700  | 3.40698500  |
| C  | -4.98396500 | -0.01325100 | -0.26904400 |
| C  | -6.29649400 | 0.47128400  | -0.22037400 |
| C  | -4.64523600 | -1.03086700 | -1.17050600 |
| C  | -7.26070000 | -0.05975900 | -1.06899100 |
| H  | -6.54013900 | 1.25391900  | 0.48276600  |
| C  | -5.62700000 | -1.54590600 | -2.01336300 |
| H  | -3.63372100 | -1.40530000 | -1.21223000 |
| C  | -6.93443800 | -1.06998400 | -1.97133600 |
| H  | -8.27418600 | 0.32288100  | -1.02210100 |
| H  | -5.35688700 | -2.33216000 | -2.70945000 |
| H  | -7.68958100 | -1.48045200 | -2.63179100 |
| C  | 5.01572300  | -0.09137100 | 0.16235700  |
| C  | 6.36566100  | 0.10714000  | -0.14877400 |
| C  | 4.64752000  | -1.06756600 | 1.09607800  |
| C  | 7.33737600  | -0.67165000 | 0.46861700  |
| H  | 6.63080600  | 0.87460700  | -0.86142500 |
| C  | 5.63618000  | -1.84094200 | 1.69931900  |
| H  | 3.60818600  | -1.21752600 | 1.34656700  |
| C  | 6.98097800  | -1.65205700 | 1.39270900  |
| H  | 8.38064200  | -0.50961200 | 0.22170900  |
| H  | 5.34370500  | -2.59409500 | 2.42235200  |
| H  | 7.74234400  | -2.25815300 | 1.86987200  |

## 14b

|   |             |            |             |
|---|-------------|------------|-------------|
| C | 3.33044000  | 2.88691300 | -0.78587200 |
| C | 0.80272900  | 2.23670300 | -1.00418200 |
| C | 2.16858000  | 2.03385700 | -0.76452000 |
| C | 2.67766200  | 0.73831500 | -0.44304500 |
| C | -0.83104600 | 0.46340800 | 2.28719300  |

|    |             |             |             |
|----|-------------|-------------|-------------|
| C  | -2.18470300 | 0.48216900  | 1.90043100  |
| C  | -2.66998200 | 0.15086100  | 0.58961500  |
| C  | -3.37494800 | 0.83134500  | 2.64270800  |
| N  | 4.41620000  | 2.21267000  | -0.51456600 |
| N  | 4.03655300  | 0.89056300  | -0.30844100 |
| N  | -4.02745800 | 0.33272400  | 0.63931900  |
| N  | -4.44536200 | 0.73592600  | 1.90118000  |
| O  | -0.05056200 | 1.30366700  | -0.87878100 |
| O  | 0.12863300  | 0.09652300  | 1.53688200  |
| O  | 2.06674300  | -0.35979300 | -0.31029200 |
| O  | -2.05606800 | -0.22314600 | -0.45792500 |
| O  | 0.14441500  | -0.76139500 | -2.65440800 |
| O  | -0.88568100 | -2.24242400 | 0.64559500  |
| Mo | -0.00856200 | -0.83989000 | -0.37006100 |
| H  | -0.72011800 | -0.79155200 | -3.07986900 |
| C  | -0.59075000 | -3.62272500 | 0.53059500  |
| H  | -1.42491900 | -4.10279000 | 0.00190300  |
| H  | -0.51368700 | -4.07057100 | 1.52731000  |
| C  | 0.71796700  | -3.71475800 | -0.25038200 |
| H  | 1.58391600  | -3.72850900 | 0.42365300  |
| H  | 0.76318200  | -4.60216200 | -0.89216600 |
| O  | 0.77076400  | -2.54402600 | -1.04267400 |
| H  | 0.54548600  | -1.64587900 | -2.73787900 |
| C  | -5.00328200 | 0.12849600  | -0.37074400 |
| C  | -6.34350400 | -0.01289700 | 0.00715800  |
| C  | -4.65377400 | 0.08695500  | -1.72531000 |
| C  | -7.31974500 | -0.20056300 | -0.96433500 |
| H  | -6.59869500 | 0.03677800  | 1.05572500  |
| C  | -5.64449500 | -0.10712400 | -2.68399000 |
| H  | -3.62119400 | 0.20765900  | -2.01265200 |
| C  | -6.97886500 | -0.25292300 | -2.31450200 |
| H  | -8.35478400 | -0.30867100 | -0.65989000 |
| H  | -5.36584800 | -0.13588400 | -3.73173800 |
| H  | -7.74361700 | -0.40147300 | -3.06803800 |
| C  | 5.02639100  | -0.07498600 | 0.00551700  |
| C  | 6.29229800  | 0.36398200  | 0.41101200  |
| C  | 4.76171200  | -1.44637400 | -0.09657400 |
| C  | 7.28052800  | -0.56457400 | 0.71609900  |
| H  | 6.48285200  | 1.42573600  | 0.47098800  |
| C  | 5.76395500  | -2.36038200 | 0.21813700  |
| H  | 3.78819700  | -1.78530200 | -0.41698200 |
| C  | 7.02427200  | -1.93142400 | 0.62570100  |
| H  | 8.25778200  | -0.21356400 | 1.02867100  |
| H  | 5.55183900  | -3.42072000 | 0.13597300  |
| H  | 7.79769900  | -2.65161600 | 0.86658300  |
| C  | -0.39760700 | 0.89171700  | 3.67024100  |
| H  | -0.80777300 | 1.86589200  | 3.93942300  |
| H  | -0.73988000 | 0.16767000  | 4.41487000  |
| H  | 0.68982000  | 0.93153400  | 3.69341600  |
| C  | -3.53911700 | 1.25533700  | 4.06949500  |
| H  | -3.13003500 | 0.51562400  | 4.76249400  |
| H  | -3.04240800 | 2.20825800  | 4.27247500  |
| H  | -4.60320100 | 1.37347500  | 4.27421400  |
| C  | 3.43567700  | 4.35437100  | -1.05981600 |
| H  | 3.03793200  | 4.61091200  | -2.04552100 |
| H  | 2.88599500  | 4.94285400  | -0.31885800 |
| H  | 4.48539900  | 4.64572800  | -1.02109000 |
| C  | 0.25143600  | 3.57311600  | -1.44202400 |
| H  | 0.62926600  | 4.38713100  | -0.82144700 |
| H  | 0.54543200  | 3.78115000  | -2.47543600 |
| H  | -0.83547800 | 3.54235800  | -1.38485100 |

**Table S2.** Comparison of selected energies for pathways **A** and **B**, in gas phase, in the  $[\text{Mo}(\text{O})_2(\text{Q}^{\text{Me}})_2]$ -catalyzed DODH of ethylene glycol with  $\text{PMe}_3$  reductant.

|                                                         | <b>Path A</b>  |                | <b>Path B</b>    |                |
|---------------------------------------------------------|----------------|----------------|------------------|----------------|
| $\Delta\text{G}$ (kcal/mol) <sup>a</sup>                |                |                |                  |                |
| Diol activation                                         | <b>TS(2-3)</b> | 32.9<br>(35.8) | <b>TS(11-12)</b> | 31.1<br>(19.6) |
| Water formation                                         | <b>TS(4-5)</b> | 17.9<br>(42.4) | <b>TS(13-14)</b> | 15.2<br>(10.6) |
| Oxo-transfer                                            | <b>TS(6-7)</b> | 16.7<br>(40.2) | <b>TS(1-9)</b>   | 12.7<br>(20.6) |
| Alkene extrusion                                        | <b>TS(8-1)</b> | 22.4<br>(13.8) | <b>TS(8-1)</b>   | 22.4<br>(13.8) |
| Energies (kcal/mol)                                     |                |                |                  |                |
| Highest TS relative energy                              | <b>TS(6-7)</b> | 42.4           | <b>TS(11-12)</b> | 20.6           |
| Highest $\Delta\text{G}$ difference                     | <b>TS(2-3)</b> | 32.9           | <b>TS(11-12)</b> | 31.1           |
| Maximum relative $\Delta\text{G}$ between intermediates |                | 49.1           |                  | 29.4           |

<sup>a</sup> Difference in the calculated Gibbs energies of the TS and its precedent intermediate. The energetic span value, which is the difference in the calculated Gibbs energies of the TS and the relative zero energy, appears in parentheses.
